# Supplementary material
Source: MDPI journal article supplement (https://www.mdpi.com/1996-1073/9/5/364)
Supplement: s1 [file s1]

## Sheet: Summary
Aggregated exergy efficiencies: an improvement to the method
Miguel Palma*, Zeus Guevara, Tânia Sousa
* miguelpalma@tecnico.ulisboa.pt
Supplementary Information
Sections	Title
A	Allocation for end-use categories, for the IEA energy balances for Portugal (1960-20009)
B	Second law efficiencies by energy carrier - end-use pair for Portugal (1960-2009)
C	Electricity shares per end-use, per sector, for Portugal (1960-2009)

## Sheet: A
A. Mapping useful work categories from IEA energy balances for the EU-15 countries (1960-2009)
Energy industry own use
Coal mines	Hard coal (if no detail)	Medium Temperature Heat
	Brown coal (if no detail)	Medium Temperature Heat
	Anthracite	Medium Temperature Heat
	Coking coal	Medium Temperature Heat
	Other bituminous coal	Medium Temperature Heat
	Sub-bituminous coal	Medium Temperature Heat
	Lignite	Medium Temperature Heat
	Peat	Medium Temperature Heat
	Patent fuel	Medium Temperature Heat
	Coke oven coke	High Temperature Heat
	Gas coke	High Temperature Heat
	Coal tar	Medium Temperature Heat
	BKB/peat briquettes	Medium Temperature Heat
	Gas works gas	High Temperature Heat
	Coke oven gas	High Temperature Heat
	Blast furnace gas	High Temperature Heat
	Other recovered gases	High Temperature Heat
	Elec/heat output from non-specified manufactured gases	Medium Temperature Heat
	Industrial waste	Medium Temperature Heat
	Municipal waste (renewable)	Low Temperature Heat
	Municipal waste (non-renewable)	Low Temperature Heat
	Primary solid biofuels	Low Temperature Heat
	Biogases	Medium Temperature Heat
	Biogasoline	Transport
	Biodiesels	Transport
	Other liquid biofuels	Transport
	Non-specified primary biofuels and waste	Low Temperature Heat
	Charcoal	Low Temperature Heat
	Natural Gas	Medium Temperature Heat
	Crude/NGL/feedstocks (if no detail)	Medium Temperature Heat
	Crude oil	Medium Temperature Heat
	Natural gas liquids	Medium Temperature Heat
	Refinery feedstocks	Low Temperature Heat
	Additives/blending components	Low Temperature Heat
	Other hydrocarbons	Low Temperature Heat
	Refinery gas	Medium Temperature Heat
	Ethane	Medium Temperature Heat
	Liquefied petroleum gases (LPG)	Transport
	Motor gasoline	Transport
	Transport gasoline	Medium Temperature Heat
	Gasoline type jet fuel	Medium Temperature Heat
	Kerosene type jet fuel	Medium Temperature Heat
	Other Kerosene	Medium Temperature Heat
	Gas/diesel oil	Stationary Mechanical Drive
	Fuel oil	Medium Temperature Heat
	Naphtha	Non-energy uses
	White spirit & SBP	Medium Temperature Heat
	Lubricants	Non-energy uses
	Bitumen	Medium Temperature Heat
	Paraffin waxes	Low Temperature Heat
	Petroleum coke	Medium Temperature Heat
	Non-specified oil products	Medium Temperature Heat
	Heat output from non-specified combustible fuels	Medium Temperature Heat
	Solar thermal	Low Temperature Heat
	Other sources	Low Temperature Heat
	Electricity	Electricity – Industry
	Heat	Medium Temperature Heat
Oil and gas extraction	Hard coal (if no detail)	Medium Temperature Heat
	Brown coal (if no detail)	Medium Temperature Heat
	Anthracite	Medium Temperature Heat
	Coking coal	Medium Temperature Heat
	Other bituminous coal	Medium Temperature Heat
	Sub-bituminous coal	Medium Temperature Heat
	Lignite	Medium Temperature Heat
	Peat	Medium Temperature Heat
	Patent fuel	Medium Temperature Heat
	Coke oven coke	High Temperature Heat
	Gas coke	High Temperature Heat
	Coal tar	Medium Temperature Heat
	BKB/peat briquettes	Medium Temperature Heat
	Gas works gas	High Temperature Heat
	Coke oven gas	High Temperature Heat
	Blast furnace gas	High Temperature Heat
	Other recovered gases	High Temperature Heat
	Elec/heat output from non-specified manufactured gases	Medium Temperature Heat
	Industrial waste	Medium Temperature Heat
	Municipal waste (renewable)	Low Temperature Heat
	Municipal waste (non-renewable)	Low Temperature Heat
	Primary solid biofuels	Low Temperature Heat
	Biogases	Medium Temperature Heat
	Biogasoline	Transport
	Biodiesels	Transport
	Other liquid biofuels	Transport
	Non-specified primary biofuels and waste	Low Temperature Heat
	Charcoal	Low Temperature Heat
	Natural Gas	Stationary Mechanical Drive
	Crude/NGL/feedstocks (if no detail)	Medium Temperature Heat
	Crude oil	Medium Temperature Heat
	Natural gas liquids	Stationary Mechanical Drive
	Refinery feedstocks	Low Temperature Heat
	Additives/blending components	Low Temperature Heat
	Other hydrocarbons	Low Temperature Heat
	Refinery gas	Medium Temperature Heat
	Ethane	Medium Temperature Heat
	Liquefied petroleum gases (LPG)	Stationary Mechanical Drive
	Motor gasoline	Stationary Mechanical Drive
	Transport gasoline	Medium Temperature Heat
	Gasoline type jet fuel	Medium Temperature Heat
	Kerosene type jet fuel	Medium Temperature Heat
	Other Kerosene	Medium Temperature Heat
	Gas/diesel oil	Stationary Mechanical Drive
	Fuel oil	Medium Temperature Heat
	Naphtha	Non-energy uses
	White spirit & SBP	Medium Temperature Heat
	Lubricants	Non-energy uses
	Bitumen	Medium Temperature Heat
	Paraffin waxes	Low Temperature Heat
	Petroleum coke	Medium Temperature Heat
	Non-specified oil products	Medium Temperature Heat
	Heat output from non-specified combustible fuels	Medium Temperature Heat
	Solar thermal	Low Temperature Heat
	Other sources	Low Temperature Heat
	Electricity	Electricity – Industry
	Heat	Medium Temperature Heat
Blast furnaces	Hard coal (if no detail)	Medium Temperature Heat
	Brown coal (if no detail)	Medium Temperature Heat
	Anthracite	Medium Temperature Heat
	Coking coal	Medium Temperature Heat
	Other bituminous coal	Medium Temperature Heat
	Sub-bituminous coal	Medium Temperature Heat
	Lignite	Medium Temperature Heat
	Peat	Medium Temperature Heat
	Patent fuel	Medium Temperature Heat
	Coke oven coke	High Temperature Heat
	Gas coke	High Temperature Heat
	Coal tar	Medium Temperature Heat
	BKB/peat briquettes	Medium Temperature Heat
	Gas works gas	High Temperature Heat
	Coke oven gas	High Temperature Heat
	Blast furnace gas	High Temperature Heat
	Other recovered gases	High Temperature Heat
	Elec/heat output from non-specified manufactured gases	Medium Temperature Heat
	Industrial waste	Medium Temperature Heat
	Municipal waste (renewable)	Low Temperature Heat
	Municipal waste (non-renewable)	Low Temperature Heat
	Primary solid biofuels	Low Temperature Heat
	Biogases	Medium Temperature Heat
	Biogasoline	Transport
	Biodiesels	Transport
	Other liquid biofuels	Transport
	Non-specified primary biofuels and waste	Low Temperature Heat
	Charcoal	Low Temperature Heat
	Natural Gas	Medium Temperature Heat
	Crude/NGL/feedstocks (if no detail)	Medium Temperature Heat
	Crude oil	Medium Temperature Heat
	Natural gas liquids	Medium Temperature Heat
	Refinery feedstocks	Low Temperature Heat
	Additives/blending components	Low Temperature Heat
	Other hydrocarbons	Low Temperature Heat
	Refinery gas	Medium Temperature Heat
	Ethane	Medium Temperature Heat
	Liquefied petroleum gases (LPG)	Transport
	Motor gasoline	Transport
	Transport gasoline	Medium Temperature Heat
	Gasoline type jet fuel	Medium Temperature Heat
	Kerosene type jet fuel	Medium Temperature Heat
	Other Kerosene	Medium Temperature Heat
	Gas/diesel oil	Stationary Mechanical Drive
	Fuel oil	Medium Temperature Heat
	Naphtha	Non-energy uses
	White spirit & SBP	Medium Temperature Heat
	Lubricants	Non-energy uses
	Bitumen	Medium Temperature Heat
	Paraffin waxes	Low Temperature Heat
	Petroleum coke	Medium Temperature Heat
	Non-specified oil products	Medium Temperature Heat
	Heat output from non-specified combustible fuels	Medium Temperature Heat
	Solar thermal	Low Temperature Heat
	Other sources	Low Temperature Heat
	Electricity	Electricity – Industry
	Heat	Medium Temperature Heat
Gas works	Hard coal (if no detail)	Medium Temperature Heat
	Brown coal (if no detail)	Medium Temperature Heat
	Anthracite	Medium Temperature Heat
	Coking coal	Medium Temperature Heat
	Other bituminous coal	Medium Temperature Heat
	Sub-bituminous coal	Medium Temperature Heat
	Lignite	Medium Temperature Heat
	Peat	Medium Temperature Heat
	Patent fuel	Medium Temperature Heat
	Coke oven coke	High Temperature Heat
	Gas coke	High Temperature Heat
	Coal tar	Medium Temperature Heat
	BKB/peat briquettes	Medium Temperature Heat
	Gas works gas	High Temperature Heat
	Coke oven gas	High Temperature Heat
	Blast furnace gas	High Temperature Heat
	Other recovered gases	High Temperature Heat
	Elec/heat output from non-specified manufactured gases	Medium Temperature Heat
	Industrial waste	Medium Temperature Heat
	Municipal waste (renewable)	Low Temperature Heat
	Municipal waste (non-renewable)	Low Temperature Heat
	Primary solid biofuels	Low Temperature Heat
	Biogases	Medium Temperature Heat
	Biogasoline	Transport
	Biodiesels	Transport
	Other liquid biofuels	Transport
	Non-specified primary biofuels and waste	Low Temperature Heat
	Charcoal	Low Temperature Heat
	Natural Gas	Medium Temperature Heat
	Crude/NGL/feedstocks (if no detail)	Medium Temperature Heat
	Crude oil	Medium Temperature Heat
	Natural gas liquids	Medium Temperature Heat
	Refinery feedstocks	Low Temperature Heat
	Additives/blending components	Low Temperature Heat
	Other hydrocarbons	Low Temperature Heat
	Refinery gas	Medium Temperature Heat
	Ethane	Medium Temperature Heat
	Liquefied petroleum gases (LPG)	Transport
	Motor gasoline	Transport
	Transport gasoline	Medium Temperature Heat
	Gasoline type jet fuel	Medium Temperature Heat
	Kerosene type jet fuel	Medium Temperature Heat
	Other Kerosene	Medium Temperature Heat
	Gas/diesel oil	Stationary Mechanical Drive
	Fuel oil	Medium Temperature Heat
	Naphtha	Non-energy uses
	White spirit & SBP	Medium Temperature Heat
	Lubricants	Non-energy uses
	Bitumen	Medium Temperature Heat
	Paraffin waxes	Low Temperature Heat
	Petroleum coke	Medium Temperature Heat
	Non-specified oil products	Medium Temperature Heat
	Heat output from non-specified combustible fuels	Medium Temperature Heat
	Solar thermal	Low Temperature Heat
	Other sources	Low Temperature Heat
	Electricity	Electricity – Industry
	Heat	Medium Temperature Heat
Gasification plants for biogases	Hard coal (if no detail)	Medium Temperature Heat
	Brown coal (if no detail)	Medium Temperature Heat
	Anthracite	Medium Temperature Heat
	Coking coal	Medium Temperature Heat
	Other bituminous coal	Medium Temperature Heat
	Sub-bituminous coal	Medium Temperature Heat
	Lignite	Medium Temperature Heat
	Peat	Medium Temperature Heat
	Patent fuel	Medium Temperature Heat
	Coke oven coke	High Temperature Heat
	Gas coke	High Temperature Heat
	Coal tar	Medium Temperature Heat
	BKB/peat briquettes	Medium Temperature Heat
	Gas works gas	High Temperature Heat
	Coke oven gas	High Temperature Heat
	Blast furnace gas	High Temperature Heat
	Other recovered gases	High Temperature Heat
	Elec/heat output from non-specified manufactured gases	Medium Temperature Heat
	Industrial waste	Medium Temperature Heat
	Municipal waste (renewable)	Low Temperature Heat
	Municipal waste (non-renewable)	Low Temperature Heat
	Primary solid biofuels	Low Temperature Heat
	Biogases	Medium Temperature Heat
	Biogasoline	Transport
	Biodiesels	Transport
	Other liquid biofuels	Transport
	Non-specified primary biofuels and waste	Low Temperature Heat
	Charcoal	Low Temperature Heat
	Natural Gas	Medium Temperature Heat
	Crude/NGL/feedstocks (if no detail)	Medium Temperature Heat
	Crude oil	Medium Temperature Heat
	Natural gas liquids	Medium Temperature Heat
	Refinery feedstocks	Low Temperature Heat
	Additives/blending components	Low Temperature Heat
	Other hydrocarbons	Low Temperature Heat
	Refinery gas	Medium Temperature Heat
	Ethane	Medium Temperature Heat
	Liquefied petroleum gases (LPG)	Transport
	Motor gasoline	Transport
	Transport gasoline	Medium Temperature Heat
	Gasoline type jet fuel	Medium Temperature Heat
	Kerosene type jet fuel	Medium Temperature Heat
	Other Kerosene	Medium Temperature Heat
	Gas/diesel oil	Stationary Mechanical Drive
	Fuel oil	Medium Temperature Heat
	Naphtha	Non-energy uses
	White spirit & SBP	Medium Temperature Heat
	Lubricants	Non-energy uses
	Bitumen	Medium Temperature Heat
	Paraffin waxes	Low Temperature Heat
	Petroleum coke	Medium Temperature Heat
	Non-specified oil products	Medium Temperature Heat
	Heat output from non-specified combustible fuels	Medium Temperature Heat
	Solar thermal	Low Temperature Heat
	Other sources	Low Temperature Heat
	Electricity	Electricity – Industry
	Heat	Medium Temperature Heat
Coke ovens	Hard coal (if no detail)	Medium Temperature Heat
	Brown coal (if no detail)	Medium Temperature Heat
	Anthracite	Medium Temperature Heat
	Coking coal	Medium Temperature Heat
	Other bituminous coal	Medium Temperature Heat
	Sub-bituminous coal	Medium Temperature Heat
	Lignite	Medium Temperature Heat
	Peat	Medium Temperature Heat
	Patent fuel	Medium Temperature Heat
	Coke oven coke	High Temperature Heat
	Gas coke	High Temperature Heat
	Coal tar	Medium Temperature Heat
	BKB/peat briquettes	Medium Temperature Heat
	Gas works gas	High Temperature Heat
	Coke oven gas	High Temperature Heat
	Blast furnace gas	High Temperature Heat
	Other recovered gases	High Temperature Heat
	Elec/heat output from non-specified manufactured gases	Medium Temperature Heat
	Industrial waste	Medium Temperature Heat
	Municipal waste (renewable)	Low Temperature Heat
	Municipal waste (non-renewable)	Low Temperature Heat
	Primary solid biofuels	Low Temperature Heat
	Biogases	Medium Temperature Heat
	Biogasoline	Transport
	Biodiesels	Transport
	Other liquid biofuels	Transport
	Non-specified primary biofuels and waste	Low Temperature Heat
	Charcoal	Low Temperature Heat
	Natural Gas	Medium Temperature Heat
	Crude/NGL/feedstocks (if no detail)	Medium Temperature Heat
	Crude oil	Medium Temperature Heat
	Natural gas liquids	Medium Temperature Heat
	Refinery feedstocks	Low Temperature Heat
	Additives/blending components	Low Temperature Heat
	Other hydrocarbons	Low Temperature Heat
	Refinery gas	Medium Temperature Heat
	Ethane	Medium Temperature Heat
	Liquefied petroleum gases (LPG)	Transport
	Motor gasoline	Transport
	Transport gasoline	Medium Temperature Heat
	Gasoline type jet fuel	Medium Temperature Heat
	Kerosene type jet fuel	Medium Temperature Heat
	Other Kerosene	Medium Temperature Heat
	Gas/diesel oil	Stationary Mechanical Drive
	Fuel oil	Medium Temperature Heat
	Naphtha	Non-energy uses
	White spirit & SBP	Medium Temperature Heat
	Lubricants	Non-energy uses
	Bitumen	Medium Temperature Heat
	Paraffin waxes	Low Temperature Heat
	Petroleum coke	Medium Temperature Heat
	Non-specified oil products	Medium Temperature Heat
	Heat output from non-specified combustible fuels	Medium Temperature Heat
	Solar thermal	Low Temperature Heat
	Other sources	Low Temperature Heat
	Electricity	Electricity – Industry
	Heat	Medium Temperature Heat
Patent fuel plants	Hard coal (if no detail)	Medium Temperature Heat
	Brown coal (if no detail)	Medium Temperature Heat
	Anthracite	Medium Temperature Heat
	Coking coal	Medium Temperature Heat
	Other bituminous coal	Medium Temperature Heat
	Sub-bituminous coal	Medium Temperature Heat
	Lignite	Medium Temperature Heat
	Peat	Medium Temperature Heat
	Patent fuel	Medium Temperature Heat
	Coke oven coke	High Temperature Heat
	Gas coke	High Temperature Heat
	Coal tar	Medium Temperature Heat
	BKB/peat briquettes	Medium Temperature Heat
	Gas works gas	High Temperature Heat
	Coke oven gas	High Temperature Heat
	Blast furnace gas	High Temperature Heat
	Other recovered gases	High Temperature Heat
	Elec/heat output from non-specified manufactured gases	Medium Temperature Heat
	Industrial waste	Medium Temperature Heat
	Municipal waste (renewable)	Low Temperature Heat
	Municipal waste (non-renewable)	Low Temperature Heat
	Primary solid biofuels	Low Temperature Heat
	Biogases	Medium Temperature Heat
	Biogasoline	Transport
	Biodiesels	Transport
	Other liquid biofuels	Transport
	Non-specified primary biofuels and waste	Low Temperature Heat
	Charcoal	Low Temperature Heat
	Natural Gas	Medium Temperature Heat
	Crude/NGL/feedstocks (if no detail)	Medium Temperature Heat
	Crude oil	Medium Temperature Heat
	Natural gas liquids	Medium Temperature Heat
	Refinery feedstocks	Low Temperature Heat
	Additives/blending components	Low Temperature Heat
	Other hydrocarbons	Low Temperature Heat
	Refinery gas	Medium Temperature Heat
	Ethane	Medium Temperature Heat
	Liquefied petroleum gases (LPG)	Transport
	Motor gasoline	Transport
	Transport gasoline	Medium Temperature Heat
	Gasoline type jet fuel	Medium Temperature Heat
	Kerosene type jet fuel	Medium Temperature Heat
	Other Kerosene	Medium Temperature Heat
	Gas/diesel oil	Stationary Mechanical Drive
	Fuel oil	Medium Temperature Heat
	Naphtha	Non-energy uses
	White spirit & SBP	Medium Temperature Heat
	Lubricants	Non-energy uses
	Bitumen	Medium Temperature Heat
	Paraffin waxes	Low Temperature Heat
	Petroleum coke	Medium Temperature Heat
	Non-specified oil products	Medium Temperature Heat
	Heat output from non-specified combustible fuels	Medium Temperature Heat
	Solar thermal	Low Temperature Heat
	Other sources	Low Temperature Heat
	Electricity	Electricity – Industry
	Heat	Medium Temperature Heat
BKB plants	Hard coal (if no detail)	Medium Temperature Heat
	Brown coal (if no detail)	Medium Temperature Heat
	Anthracite	Medium Temperature Heat
	Coking coal	Medium Temperature Heat
	Other bituminous coal	Medium Temperature Heat
	Sub-bituminous coal	Medium Temperature Heat
	Lignite	Medium Temperature Heat
	Peat	Medium Temperature Heat
	Patent fuel	Medium Temperature Heat
	Coke oven coke	High Temperature Heat
	Gas coke	High Temperature Heat
	Coal tar	Medium Temperature Heat
	BKB/peat briquettes	Medium Temperature Heat
	Gas works gas	High Temperature Heat
	Coke oven gas	High Temperature Heat
	Blast furnace gas	High Temperature Heat
	Other recovered gases	High Temperature Heat
	Elec/heat output from non-specified manufactured gases	Medium Temperature Heat
	Industrial waste	Medium Temperature Heat
	Municipal waste (renewable)	Low Temperature Heat
	Municipal waste (non-renewable)	Low Temperature Heat
	Primary solid biofuels	Low Temperature Heat
	Biogases	Medium Temperature Heat
	Biogasoline	Transport
	Biodiesels	Transport
	Other liquid biofuels	Transport
	Non-specified primary biofuels and waste	Low Temperature Heat
	Charcoal	Low Temperature Heat
	Natural Gas	Medium Temperature Heat
	Crude/NGL/feedstocks (if no detail)	Medium Temperature Heat
	Crude oil	Medium Temperature Heat
	Natural gas liquids	Medium Temperature Heat
	Refinery feedstocks	Low Temperature Heat
	Additives/blending components	Low Temperature Heat
	Other hydrocarbons	Low Temperature Heat
	Refinery gas	Medium Temperature Heat
	Ethane	Medium Temperature Heat
	Liquefied petroleum gases (LPG)	Transport
	Motor gasoline	Transport
	Transport gasoline	Medium Temperature Heat
	Gasoline type jet fuel	Medium Temperature Heat
	Kerosene type jet fuel	Medium Temperature Heat
	Other Kerosene	Medium Temperature Heat
	Gas/diesel oil	Stationary Mechanical Drive
	Fuel oil	Medium Temperature Heat
	Naphtha	Non-energy uses
	White spirit & SBP	Medium Temperature Heat
	Lubricants	Non-energy uses
	Bitumen	Medium Temperature Heat
	Paraffin waxes	Low Temperature Heat
	Petroleum coke	Medium Temperature Heat
	Non-specified oil products	Medium Temperature Heat
	Heat output from non-specified combustible fuels	Medium Temperature Heat
	Solar thermal	Low Temperature Heat
	Other sources	Low Temperature Heat
	Electricity	Electricity – Industry
	Heat	Medium Temperature Heat
Oil refineries	Hard coal (if no detail)	Medium Temperature Heat
	Brown coal (if no detail)	Medium Temperature Heat
	Anthracite	Medium Temperature Heat
	Coking coal	Medium Temperature Heat
	Other bituminous coal	Medium Temperature Heat
	Sub-bituminous coal	Medium Temperature Heat
	Lignite	Medium Temperature Heat
	Peat	Medium Temperature Heat
	Patent fuel	Medium Temperature Heat
	Coke oven coke	High Temperature Heat
	Gas coke	High Temperature Heat
	Coal tar	Medium Temperature Heat
	BKB/peat briquettes	Medium Temperature Heat
	Gas works gas	High Temperature Heat
	Coke oven gas	High Temperature Heat
	Blast furnace gas	High Temperature Heat
	Other recovered gases	High Temperature Heat
	Elec/heat output from non-specified manufactured gases	Medium Temperature Heat
	Industrial waste	Medium Temperature Heat
	Municipal waste (renewable)	Low Temperature Heat
	Municipal waste (non-renewable)	Low Temperature Heat
	Primary solid biofuels	Low Temperature Heat
	Biogases	Medium Temperature Heat
	Biogasoline	Transport
	Biodiesels	Transport
	Other liquid biofuels	Transport
	Non-specified primary biofuels and waste	Low Temperature Heat
	Charcoal	Low Temperature Heat
	Natural Gas	Medium Temperature Heat
	Crude/NGL/feedstocks (if no detail)	Medium Temperature Heat
	Crude oil	Medium Temperature Heat
	Natural gas liquids	Medium Temperature Heat
	Refinery feedstocks	Low Temperature Heat
	Additives/blending components	Low Temperature Heat
	Other hydrocarbons	Low Temperature Heat
	Refinery gas	Medium Temperature Heat
	Ethane	Medium Temperature Heat
	Liquefied petroleum gases (LPG)	Transport
	Motor gasoline	Transport
	Transport gasoline	Medium Temperature Heat
	Gasoline type jet fuel	Medium Temperature Heat
	Kerosene type jet fuel	Medium Temperature Heat
	Other Kerosene	Medium Temperature Heat
	Gas/diesel oil	Stationary Mechanical Drive
	Fuel oil	Medium Temperature Heat
	Naphtha	Non-energy uses
	White spirit & SBP	Medium Temperature Heat
	Lubricants	Non-energy uses
	Bitumen	Medium Temperature Heat
	Paraffin waxes	Low Temperature Heat
	Petroleum coke	Medium Temperature Heat
	Non-specified oil products	Medium Temperature Heat
	Heat output from non-specified combustible fuels	Medium Temperature Heat
	Solar thermal	Low Temperature Heat
	Other sources	Low Temperature Heat
	Electricity	Electricity – Industry
	Heat	Medium Temperature Heat
Coal liquefaction plants	Hard coal (if no detail)	Medium Temperature Heat
	Brown coal (if no detail)	Medium Temperature Heat
	Anthracite	Medium Temperature Heat
	Coking coal	Medium Temperature Heat
	Other bituminous coal	Medium Temperature Heat
	Sub-bituminous coal	Medium Temperature Heat
	Lignite	Medium Temperature Heat
	Peat	Medium Temperature Heat
	Patent fuel	Medium Temperature Heat
	Coke oven coke	High Temperature Heat
	Gas coke	High Temperature Heat
	Coal tar	Medium Temperature Heat
	BKB/peat briquettes	Medium Temperature Heat
	Gas works gas	High Temperature Heat
	Coke oven gas	High Temperature Heat
	Blast furnace gas	High Temperature Heat
	Other recovered gases	High Temperature Heat
	Elec/heat output from non-specified manufactured gases	Medium Temperature Heat
	Industrial waste	Medium Temperature Heat
	Municipal waste (renewable)	Low Temperature Heat
	Municipal waste (non-renewable)	Low Temperature Heat
	Primary solid biofuels	Low Temperature Heat
	Biogases	Medium Temperature Heat
	Biogasoline	Transport
	Biodiesels	Transport
	Other liquid biofuels	Transport
	Non-specified primary biofuels and waste	Low Temperature Heat
	Charcoal	Low Temperature Heat
	Natural Gas	Medium Temperature Heat
	Crude/NGL/feedstocks (if no detail)	Medium Temperature Heat
	Crude oil	Medium Temperature Heat
	Natural gas liquids	Medium Temperature Heat
	Refinery feedstocks	Low Temperature Heat
	Additives/blending components	Low Temperature Heat
	Other hydrocarbons	Low Temperature Heat
	Refinery gas	Medium Temperature Heat
	Ethane	Medium Temperature Heat
	Liquefied petroleum gases (LPG)	Transport
	Motor gasoline	Transport
	Transport gasoline	Medium Temperature Heat
	Gasoline type jet fuel	Medium Temperature Heat
	Kerosene type jet fuel	Medium Temperature Heat
	Other Kerosene	Medium Temperature Heat
	Gas/diesel oil	Stationary Mechanical Drive
	Fuel oil	Medium Temperature Heat
	Naphtha	Non-energy uses
	White spirit & SBP	Medium Temperature Heat
	Lubricants	Non-energy uses
	Bitumen	Medium Temperature Heat
	Paraffin waxes	Low Temperature Heat
	Petroleum coke	Medium Temperature Heat
	Non-specified oil products	Medium Temperature Heat
	Heat output from non-specified combustible fuels	Medium Temperature Heat
	Solar thermal	Low Temperature Heat
	Other sources	Low Temperature Heat
	Electricity	Electricity – Industry
	Heat	Medium Temperature Heat
Liquefaction (LNG) / regasification plants	Hard coal (if no detail)	Medium Temperature Heat
	Brown coal (if no detail)	Medium Temperature Heat
	Anthracite	Medium Temperature Heat
	Coking coal	Medium Temperature Heat
	Other bituminous coal	Medium Temperature Heat
	Sub-bituminous coal	Medium Temperature Heat
	Lignite	Medium Temperature Heat
	Peat	Medium Temperature Heat
	Patent fuel	Medium Temperature Heat
	Coke oven coke	High Temperature Heat
	Gas coke	High Temperature Heat
	Coal tar	Medium Temperature Heat
	BKB/peat briquettes	Medium Temperature Heat
	Gas works gas	High Temperature Heat
	Coke oven gas	High Temperature Heat
	Blast furnace gas	High Temperature Heat
	Other recovered gases	High Temperature Heat
	Elec/heat output from non-specified manufactured gases	Medium Temperature Heat
	Industrial waste	Medium Temperature Heat
	Municipal waste (renewable)	Low Temperature Heat
	Municipal waste (non-renewable)	Low Temperature Heat
	Primary solid biofuels	Low Temperature Heat
	Biogases	Medium Temperature Heat
	Biogasoline	Stationary Mechanical Drive
	Biodiesels	Stationary Mechanical Drive
	Other liquid biofuels	Stationary Mechanical Drive
	Non-specified primary biofuels and waste	Low Temperature Heat
	Charcoal	Low Temperature Heat
	Natural Gas	Stationary Mechanical Drive
	Crude/NGL/feedstocks (if no detail)	Medium Temperature Heat
	Crude oil	Medium Temperature Heat
	Natural gas liquids	Stationary Mechanical Drive
	Refinery feedstocks	Low Temperature Heat
	Additives/blending components	Low Temperature Heat
	Other hydrocarbons	Low Temperature Heat
	Refinery gas	Medium Temperature Heat
	Ethane	Medium Temperature Heat
	Liquefied petroleum gases (LPG)	Stationary Mechanical Drive
	Motor gasoline	Stationary Mechanical Drive
	Transport gasoline	Medium Temperature Heat
	Gasoline type jet fuel	Medium Temperature Heat
	Kerosene type jet fuel	Medium Temperature Heat
	Other Kerosene	Medium Temperature Heat
	Gas/diesel oil	Stationary Mechanical Drive
	Fuel oil	Medium Temperature Heat
	Naphtha	Non-energy uses
	White spirit & SBP	Medium Temperature Heat
	Lubricants	Non-energy uses
	Bitumen	Medium Temperature Heat
	Paraffin waxes	Low Temperature Heat
	Petroleum coke	Medium Temperature Heat
	Non-specified oil products	Medium Temperature Heat
	Heat output from non-specified combustible fuels	Medium Temperature Heat
	Solar thermal	Low Temperature Heat
	Other sources	Low Temperature Heat
	Electricity	Electricity – Industry
	Heat	Medium Temperature Heat
Gas-to-liquids (GTL) plants	Hard coal (if no detail)	Medium Temperature Heat
	Brown coal (if no detail)	Medium Temperature Heat
	Anthracite	Medium Temperature Heat
	Coking coal	Medium Temperature Heat
	Other bituminous coal	Medium Temperature Heat
	Sub-bituminous coal	Medium Temperature Heat
	Lignite	Medium Temperature Heat
	Peat	Medium Temperature Heat
	Patent fuel	Medium Temperature Heat
	Coke oven coke	High Temperature Heat
	Gas coke	High Temperature Heat
	Coal tar	Medium Temperature Heat
	BKB/peat briquettes	Medium Temperature Heat
	Gas works gas	High Temperature Heat
	Coke oven gas	High Temperature Heat
	Blast furnace gas	High Temperature Heat
	Other recovered gases	High Temperature Heat
	Elec/heat output from non-specified manufactured gases	Medium Temperature Heat
	Industrial waste	Medium Temperature Heat
	Municipal waste (renewable)	Low Temperature Heat
	Municipal waste (non-renewable)	Low Temperature Heat
	Primary solid biofuels	Low Temperature Heat
	Biogases	Medium Temperature Heat
	Biogasoline	Stationary Mechanical Drive
	Biodiesels	Stationary Mechanical Drive
	Other liquid biofuels	Stationary Mechanical Drive
	Non-specified primary biofuels and waste	Low Temperature Heat
	Charcoal	Low Temperature Heat
	Natural Gas	Stationary Mechanical Drive
	Crude/NGL/feedstocks (if no detail)	Medium Temperature Heat
	Crude oil	Medium Temperature Heat
	Natural gas liquids	Stationary Mechanical Drive
	Refinery feedstocks	Low Temperature Heat
	Additives/blending components	Low Temperature Heat
	Other hydrocarbons	Low Temperature Heat
	Refinery gas	Medium Temperature Heat
	Ethane	Medium Temperature Heat
	Liquefied petroleum gases (LPG)	Stationary Mechanical Drive
	Motor gasoline	Stationary Mechanical Drive
	Transport gasoline	Medium Temperature Heat
	Gasoline type jet fuel	Medium Temperature Heat
	Kerosene type jet fuel	Medium Temperature Heat
	Other Kerosene	Medium Temperature Heat
	Gas/diesel oil	Stationary Mechanical Drive
	Fuel oil	Medium Temperature Heat
	Naphtha	Non-energy uses
	White spirit & SBP	Medium Temperature Heat
	Lubricants	Non-energy uses
	Bitumen	Medium Temperature Heat
	Paraffin waxes	Low Temperature Heat
	Petroleum coke	Medium Temperature Heat
	Non-specified oil products	Medium Temperature Heat
	Heat output from non-specified combustible fuels	Medium Temperature Heat
	Solar thermal	Low Temperature Heat
	Other sources	Low Temperature Heat
	Electricity	Electricity – Industry
	Heat	Medium Temperature Heat
Own use in electricity CHP and heat plants	Hard coal (if no detail)	Medium Temperature Heat
	Brown coal (if no detail)	Medium Temperature Heat
	Anthracite	Medium Temperature Heat
	Coking coal	Medium Temperature Heat
	Other bituminous coal	Medium Temperature Heat
	Sub-bituminous coal	Medium Temperature Heat
	Lignite	Medium Temperature Heat
	Peat	Medium Temperature Heat
	Patent fuel	Medium Temperature Heat
	Coke oven coke	High Temperature Heat
	Gas coke	High Temperature Heat
	Coal tar	Medium Temperature Heat
	BKB/peat briquettes	Medium Temperature Heat
	Gas works gas	High Temperature Heat
	Coke oven gas	High Temperature Heat
	Blast furnace gas	High Temperature Heat
	Other recovered gases	High Temperature Heat
	Elec/heat output from non-specified manufactured gases	Medium Temperature Heat
	Industrial waste	Medium Temperature Heat
	Municipal waste (renewable)	Low Temperature Heat
	Municipal waste (non-renewable)	Low Temperature Heat
	Primary solid biofuels	Low Temperature Heat
	Biogases	Medium Temperature Heat
	Biogasoline	Transport
	Biodiesels	Transport
	Other liquid biofuels	Transport
	Non-specified primary biofuels and waste	Low Temperature Heat
	Charcoal	Low Temperature Heat
	Natural Gas	Stationary Mechanical Drive
	Crude/NGL/feedstocks (if no detail)	Medium Temperature Heat
	Crude oil	Medium Temperature Heat
	Natural gas liquids	Stationary Mechanical Drive
	Refinery feedstocks	Low Temperature Heat
	Additives/blending components	Low Temperature Heat
	Other hydrocarbons	Low Temperature Heat
	Refinery gas	Medium Temperature Heat
	Ethane	Medium Temperature Heat
	Liquefied petroleum gases (LPG)	Stationary Mechanical Drive
	Motor gasoline	Stationary Mechanical Drive
	Transport gasoline	Medium Temperature Heat
	Gasoline type jet fuel	Medium Temperature Heat
	Kerosene type jet fuel	Medium Temperature Heat
	Other Kerosene	Medium Temperature Heat
	Gas/diesel oil	Stationary Mechanical Drive
	Fuel oil	Stationary Mechanical Drive
	Naphtha	Non-energy uses
	White spirit & SBP	Medium Temperature Heat
	Lubricants	Non-energy uses
	Bitumen	Medium Temperature Heat
	Paraffin waxes	Low Temperature Heat
	Petroleum coke	Medium Temperature Heat
	Non-specified oil products	Medium Temperature Heat
	Heat output from non-specified combustible fuels	Medium Temperature Heat
	Solar thermal	Low Temperature Heat
	Other sources	Low Temperature Heat
	Electricity	Electricity – Industry
	Heat	Medium Temperature Heat
Pumped storage plants	Hard coal (if no detail)	Medium Temperature Heat
	Brown coal (if no detail)	Medium Temperature Heat
	Anthracite	Medium Temperature Heat
	Coking coal	Medium Temperature Heat
	Other bituminous coal	Medium Temperature Heat
	Sub-bituminous coal	Medium Temperature Heat
	Lignite	Medium Temperature Heat
	Peat	Medium Temperature Heat
	Patent fuel	Medium Temperature Heat
	Coke oven coke	High Temperature Heat
	Gas coke	High Temperature Heat
	Coal tar	Medium Temperature Heat
	BKB/peat briquettes	Medium Temperature Heat
	Gas works gas	High Temperature Heat
	Coke oven gas	High Temperature Heat
	Blast furnace gas	High Temperature Heat
	Other recovered gases	High Temperature Heat
	Elec/heat output from non-specified manufactured gases	Medium Temperature Heat
	Industrial waste	Medium Temperature Heat
	Municipal waste (renewable)	Low Temperature Heat
	Municipal waste (non-renewable)	Low Temperature Heat
	Primary solid biofuels	Low Temperature Heat
	Biogases	Medium Temperature Heat
	Biogasoline	Stationary Mechanical Drive
	Biodiesels	Stationary Mechanical Drive
	Other liquid biofuels	Stationary Mechanical Drive
	Non-specified primary biofuels and waste	Low Temperature Heat
	Charcoal	Low Temperature Heat
	Natural Gas	Stationary Mechanical Drive
	Crude/NGL/feedstocks (if no detail)	Medium Temperature Heat
	Crude oil	Medium Temperature Heat
	Natural gas liquids	Stationary Mechanical Drive
	Refinery feedstocks	Low Temperature Heat
	Additives/blending components	Low Temperature Heat
	Other hydrocarbons	Low Temperature Heat
	Refinery gas	Medium Temperature Heat
	Ethane	Medium Temperature Heat
	Liquefied petroleum gases (LPG)	Stationary Mechanical Drive
	Motor gasoline	Stationary Mechanical Drive
	Transport gasoline	Stationary Mechanical Drive
	Gasoline type jet fuel	Stationary Mechanical Drive
	Kerosene type jet fuel	Stationary Mechanical Drive
	Other Kerosene	Stationary Mechanical Drive
	Gas/diesel oil	Stationary Mechanical Drive
	Fuel oil	Stationary Mechanical Drive
	Naphtha	Non-energy uses
	White spirit & SBP	Medium Temperature Heat
	Lubricants	Non-energy uses
	Bitumen	Medium Temperature Heat
	Paraffin waxes	Low Temperature Heat
	Petroleum coke	Medium Temperature Heat
	Non-specified oil products	Medium Temperature Heat
	Heat output from non-specified combustible fuels	Medium Temperature Heat
	Solar thermal	Low Temperature Heat
	Other sources	Low Temperature Heat
	Electricity	Electricity – Industry
	Heat	Medium Temperature Heat
Nuclear industry	Hard coal (if no detail)	Medium Temperature Heat
	Brown coal (if no detail)	Medium Temperature Heat
	Anthracite	Medium Temperature Heat
	Coking coal	Medium Temperature Heat
	Other bituminous coal	Medium Temperature Heat
	Sub-bituminous coal	Medium Temperature Heat
	Lignite	Medium Temperature Heat
	Peat	Medium Temperature Heat
	Patent fuel	Medium Temperature Heat
	Coke oven coke	High Temperature Heat
	Gas coke	High Temperature Heat
	Coal tar	Medium Temperature Heat
	BKB/peat briquettes	Medium Temperature Heat
	Gas works gas	High Temperature Heat
	Coke oven gas	High Temperature Heat
	Blast furnace gas	High Temperature Heat
	Other recovered gases	High Temperature Heat
	Elec/heat output from non-specified manufactured gases	Medium Temperature Heat
	Industrial waste	Medium Temperature Heat
	Municipal waste (renewable)	Low Temperature Heat
	Municipal waste (non-renewable)	Low Temperature Heat
	Primary solid biofuels	Low Temperature Heat
	Biogases	Medium Temperature Heat
	Biogasoline	Transport
	Biodiesels	Transport
	Other liquid biofuels	Transport
	Non-specified primary biofuels and waste	Low Temperature Heat
	Charcoal	Low Temperature Heat
	Natural Gas	Medium Temperature Heat
	Crude/NGL/feedstocks (if no detail)	Medium Temperature Heat
	Crude oil	Medium Temperature Heat
	Natural gas liquids	Medium Temperature Heat
	Refinery feedstocks	Low Temperature Heat
	Additives/blending components	Low Temperature Heat
	Other hydrocarbons	Low Temperature Heat
	Refinery gas	Medium Temperature Heat
	Ethane	Medium Temperature Heat
	Liquefied petroleum gases (LPG)	Transport
	Motor gasoline	Transport
	Transport gasoline	Medium Temperature Heat
	Gasoline type jet fuel	Medium Temperature Heat
	Kerosene type jet fuel	Medium Temperature Heat
	Other Kerosene	Medium Temperature Heat
	Gas/diesel oil	Stationary Mechanical Drive
	Fuel oil	Medium Temperature Heat
	Naphtha	Non-energy uses
	White spirit & SBP	Medium Temperature Heat
	Lubricants	Non-energy uses
	Bitumen	Medium Temperature Heat
	Paraffin waxes	Low Temperature Heat
	Petroleum coke	Medium Temperature Heat
	Non-specified oil products	Medium Temperature Heat
	Heat output from non-specified combustible fuels	Medium Temperature Heat
	Solar thermal	Low Temperature Heat
	Other sources	Low Temperature Heat
	Electricity	Electricity – Industry
	Heat	Medium Temperature Heat
Charcoal production plants	Hard coal (if no detail)	Medium Temperature Heat
	Brown coal (if no detail)	Medium Temperature Heat
	Anthracite	Medium Temperature Heat
	Coking coal	Medium Temperature Heat
	Other bituminous coal	Medium Temperature Heat
	Sub-bituminous coal	Medium Temperature Heat
	Lignite	Medium Temperature Heat
	Peat	Medium Temperature Heat
	Patent fuel	Medium Temperature Heat
	Coke oven coke	High Temperature Heat
	Gas coke	High Temperature Heat
	Coal tar	Medium Temperature Heat
	BKB/peat briquettes	Medium Temperature Heat
	Gas works gas	High Temperature Heat
	Coke oven gas	High Temperature Heat
	Blast furnace gas	High Temperature Heat
	Other recovered gases	High Temperature Heat
	Elec/heat output from non-specified manufactured gases	Medium Temperature Heat
	Industrial waste	Medium Temperature Heat
	Municipal waste (renewable)	Low Temperature Heat
	Municipal waste (non-renewable)	Low Temperature Heat
	Primary solid biofuels	Low Temperature Heat
	Biogases	Medium Temperature Heat
	Biogasoline	Transport
	Biodiesels	Stationary Mechanical Drive
	Other liquid biofuels	Transport
	Non-specified primary biofuels and waste	Low Temperature Heat
	Charcoal	Low Temperature Heat
	Natural Gas	Medium Temperature Heat
	Crude/NGL/feedstocks (if no detail)	Medium Temperature Heat
	Crude oil	Medium Temperature Heat
	Natural gas liquids	Medium Temperature Heat
	Refinery feedstocks	Low Temperature Heat
	Additives/blending components	Low Temperature Heat
	Other hydrocarbons	Low Temperature Heat
	Refinery gas	Medium Temperature Heat
	Ethane	Medium Temperature Heat
	Liquefied petroleum gases (LPG)	Transport
	Motor gasoline	Transport
	Transport gasoline	Medium Temperature Heat
	Gasoline type jet fuel	Medium Temperature Heat
	Kerosene type jet fuel	Medium Temperature Heat
	Other Kerosene	Medium Temperature Heat
	Gas/diesel oil	Transport
	Fuel oil	Medium Temperature Heat
	Naphtha	Non-energy uses
	White spirit & SBP	Medium Temperature Heat
	Lubricants	Non-energy uses
	Bitumen	Medium Temperature Heat
	Paraffin waxes	Low Temperature Heat
	Petroleum coke	Medium Temperature Heat
	Non-specified oil products	Medium Temperature Heat
	Heat output from non-specified combustible fuels	Medium Temperature Heat
	Solar thermal	Low Temperature Heat
	Other sources	Low Temperature Heat
	Electricity	Electricity – Industry
	Heat	Medium Temperature Heat
Non-specified (energy)	Hard coal (if no detail)	Medium Temperature Heat
	Brown coal (if no detail)	Medium Temperature Heat
	Anthracite	Medium Temperature Heat
	Coking coal	Medium Temperature Heat
	Other bituminous coal	Medium Temperature Heat
	Sub-bituminous coal	Medium Temperature Heat
	Lignite	Medium Temperature Heat
	Peat	Medium Temperature Heat
	Patent fuel	Medium Temperature Heat
	Coke oven coke	High Temperature Heat
	Gas coke	High Temperature Heat
	Coal tar	Medium Temperature Heat
	BKB/peat briquettes	Medium Temperature Heat
	Gas works gas	High Temperature Heat
	Coke oven gas	High Temperature Heat
	Blast furnace gas	High Temperature Heat
	Other recovered gases	High Temperature Heat
	Elec/heat output from non-specified manufactured gases	Medium Temperature Heat
	Industrial waste	Medium Temperature Heat
	Municipal waste (renewable)	Low Temperature Heat
	Municipal waste (non-renewable)	Low Temperature Heat
	Primary solid biofuels	Low Temperature Heat
	Biogases	Medium Temperature Heat
	Biogasoline	Transport
	Biodiesels	Transport
	Other liquid biofuels	Transport
	Non-specified primary biofuels and waste	Low Temperature Heat
	Charcoal	Low Temperature Heat
	Natural Gas	Medium Temperature Heat
	Crude/NGL/feedstocks (if no detail)	Medium Temperature Heat
	Crude oil	Medium Temperature Heat
	Natural gas liquids	Medium Temperature Heat
	Refinery feedstocks	Low Temperature Heat
	Additives/blending components	Low Temperature Heat
	Other hydrocarbons	Low Temperature Heat
	Refinery gas	Medium Temperature Heat
	Ethane	Medium Temperature Heat
	Liquefied petroleum gases (LPG)	Transport
	Motor gasoline	Transport
	Transport gasoline	Medium Temperature Heat
	Gasoline type jet fuel	Medium Temperature Heat
	Kerosene type jet fuel	Medium Temperature Heat
	Other Kerosene	Medium Temperature Heat
	Gas/diesel oil	Stationary Mechanical Drive
	Fuel oil	Medium Temperature Heat
	Naphtha	Non-energy uses
	White spirit & SBP	Medium Temperature Heat
	Lubricants	Non-energy uses
	Bitumen	Medium Temperature Heat
	Paraffin waxes	Low Temperature Heat
	Petroleum coke	Medium Temperature Heat
	Non-specified oil products	Medium Temperature Heat
	Heat output from non-specified combustible fuels	Medium Temperature Heat
	Solar thermal	Low Temperature Heat
	Other sources	Low Temperature Heat
	Electricity	Electricity – Industry
	Heat	Medium Temperature Heat
Industry
Iron and steel	Hard coal (if no detail)	High Temperature Heat
	Brown coal (if no detail)	High Temperature Heat
	Anthracite	High Temperature Heat
	Coking coal	High Temperature Heat
	Other bituminous coal	High Temperature Heat
	Sub-bituminous coal	High Temperature Heat
	Lignite	High Temperature Heat
	Peat	High Temperature Heat
	Patent fuel	High Temperature Heat
	Coke oven coke	High Temperature Heat
	Gas coke	High Temperature Heat
	Coal tar	High Temperature Heat
	BKB/peat briquettes	High Temperature Heat
	Gas works gas	High Temperature Heat
	Coke oven gas	High Temperature Heat
	Blast furnace gas	High Temperature Heat
	Other recovered gases	High Temperature Heat
	Elec/heat output from non-specified manufactured gases	High Temperature Heat
	Industrial waste	High Temperature Heat
	Municipal waste (renewable)	High Temperature Heat
	Municipal waste (non-renewable)	High Temperature Heat
	Primary solid biofuels	Medium Temperature Heat
	Biogases	High Temperature Heat
	Biogasoline	High Temperature Heat
	Biodiesels	High Temperature Heat
	Other liquid biofuels	High Temperature Heat
	Non-specified primary biofuels and waste	High Temperature Heat
	Charcoal	High Temperature Heat
	Natural Gas	High Temperature Heat
	Crude/NGL/feedstocks (if no detail)	High Temperature Heat
	Crude oil	High Temperature Heat
	Natural gas liquids	High Temperature Heat
	Refinery feedstocks	High Temperature Heat
	Additives/blending components	High Temperature Heat
	Other hydrocarbons	High Temperature Heat
	Refinery gas	High Temperature Heat
	Ethane	High Temperature Heat
	Liquefied petroleum gases (LPG)	High Temperature Heat
	Motor gasoline	High Temperature Heat
	Transport gasoline	High Temperature Heat
	Gasoline type jet fuel	High Temperature Heat
	Kerosene type jet fuel	High Temperature Heat
	Other Kerosene	High Temperature Heat
	Gas/diesel oil	High Temperature Heat
	Fuel oil	High Temperature Heat
	Naphtha	High Temperature Heat
	White spirit & SBP	High Temperature Heat
	Lubricants	High Temperature Heat
	Bitumen	High Temperature Heat
	Paraffin waxes	High Temperature Heat
	Petroleum coke	High Temperature Heat
	Non-specified oil products	High Temperature Heat
	Heat output from non-specified combustible fuels	High Temperature Heat
	Geothermal	Medium Temperature Heat
	Solar thermal	Low Temperature Heat
	Other sources	Medium Temperature Heat
	Electricity	Electricity – Industry
	Heat	Medium Temperature Heat
Chemical and petrochemical	Hard coal (if no detail)	Medium Temperature Heat
	Brown coal (if no detail)	Medium Temperature Heat
	Anthracite	Medium Temperature Heat
	Coking coal	Medium Temperature Heat
	Other bituminous coal	Medium Temperature Heat
	Sub-bituminous coal	Medium Temperature Heat
	Lignite	Medium Temperature Heat
	Peat	Medium Temperature Heat
	Patent fuel	Medium Temperature Heat
	Coke oven coke	High Temperature Heat
	Gas coke	High Temperature Heat
	Coal tar	High Temperature Heat
	BKB/peat briquettes	High Temperature Heat
	Gas works gas	High Temperature Heat
	Coke oven gas	High Temperature Heat
	Blast furnace gas	High Temperature Heat
	Other recovered gases	High Temperature Heat
	Elec/heat output from non-specified manufactured gases	High Temperature Heat
	Industrial waste	Medium Temperature Heat
	Municipal waste (renewable)	Medium Temperature Heat
	Municipal waste (non-renewable)	Medium Temperature Heat
	Primary solid biofuels	Low Temperature Heat
	Biogases	High Temperature Heat
	Biogasoline	High Temperature Heat
	Biodiesels	High Temperature Heat
	Other liquid biofuels	High Temperature Heat
	Non-specified primary biofuels and waste	Low Temperature Heat
	Charcoal	Low Temperature Heat
	Natural Gas	High Temperature Heat
	Crude/NGL/feedstocks (if no detail)	Medium Temperature Heat
	Crude oil	Medium Temperature Heat
	Natural gas liquids	Medium Temperature Heat
	Refinery feedstocks	Medium Temperature Heat
	Additives/blending components	Medium Temperature Heat
	Other hydrocarbons	Medium Temperature Heat
	Refinery gas	Medium Temperature Heat
	Ethane	Medium Temperature Heat
	Liquefied petroleum gases (LPG)	Medium Temperature Heat
	Motor gasoline	Transport
	Transport gasoline	Transport
	Gasoline type jet fuel	Transport
	Kerosene type jet fuel	Transport
	Other Kerosene	Medium Temperature Heat
	Gas/diesel oil	Stationary Mechanical Drive
	Fuel oil	Medium Temperature Heat
	Naphtha	Medium Temperature Heat
	White spirit & SBP	Medium Temperature Heat
	Lubricants	Medium Temperature Heat
	Bitumen	Medium Temperature Heat
	Paraffin waxes	Medium Temperature Heat
	Petroleum coke	Medium Temperature Heat
	Non-specified oil products	Medium Temperature Heat
	Heat output from non-specified combustible fuels	Medium Temperature Heat
	Geothermal	Medium Temperature Heat
	Solar thermal	Low Temperature Heat
	Other sources	Medium Temperature Heat
	Electricity	Electricity – Industry
	Heat	Medium Temperature Heat
Non-ferrous metals	Hard coal (if no detail)	Medium Temperature Heat
	Brown coal (if no detail)	Medium Temperature Heat
	Anthracite	Medium Temperature Heat
	Coking coal	Medium Temperature Heat
	Other bituminous coal	Medium Temperature Heat
	Sub-bituminous coal	Medium Temperature Heat
	Lignite	Medium Temperature Heat
	Peat	Medium Temperature Heat
	Patent fuel	Medium Temperature Heat
	Coke oven coke	High Temperature Heat
	Gas coke	High Temperature Heat
	Coal tar	High Temperature Heat
	BKB/peat briquettes	High Temperature Heat
	Gas works gas	High Temperature Heat
	Coke oven gas	High Temperature Heat
	Blast furnace gas	High Temperature Heat
	Other recovered gases	High Temperature Heat
	Elec/heat output from non-specified manufactured gases	High Temperature Heat
	Industrial waste	Medium Temperature Heat
	Municipal waste (renewable)	Medium Temperature Heat
	Municipal waste (non-renewable)	Medium Temperature Heat
	Primary solid biofuels	Low Temperature Heat
	Biogases	High Temperature Heat
	Biogasoline	High Temperature Heat
	Biodiesels	High Temperature Heat
	Other liquid biofuels	High Temperature Heat
	Non-specified primary biofuels and waste	Low Temperature Heat
	Charcoal	Low Temperature Heat
	Natural Gas	High Temperature Heat
	Crude/NGL/feedstocks (if no detail)	Medium Temperature Heat
	Crude oil	Medium Temperature Heat
	Natural gas liquids	Medium Temperature Heat
	Refinery feedstocks	Medium Temperature Heat
	Additives/blending components	Medium Temperature Heat
	Other hydrocarbons	Medium Temperature Heat
	Refinery gas	Medium Temperature Heat
	Ethane	Medium Temperature Heat
	Liquefied petroleum gases (LPG)	Medium Temperature Heat
	Motor gasoline	Transport
	Transport gasoline	Transport
	Gasoline type jet fuel	Transport
	Kerosene type jet fuel	Transport
	Other Kerosene	Medium Temperature Heat
	Gas/diesel oil	Stationary Mechanical Drive
	Fuel oil	Medium Temperature Heat
	Naphtha	Medium Temperature Heat
	White spirit & SBP	Medium Temperature Heat
	Lubricants	Medium Temperature Heat
	Bitumen	Medium Temperature Heat
	Paraffin waxes	Medium Temperature Heat
	Petroleum coke	Medium Temperature Heat
	Non-specified oil products	Medium Temperature Heat
	Heat output from non-specified combustible fuels	Medium Temperature Heat
	Geothermal	Medium Temperature Heat
	Solar thermal	Low Temperature Heat
	Other sources	Medium Temperature Heat
	Electricity	Electricity – Industry
	Heat	Medium Temperature Heat
Non-metallic minerals	Hard coal (if no detail)	Medium Temperature Heat
	Brown coal (if no detail)	Medium Temperature Heat
	Anthracite	High Temperature Heat
	Coking coal	High Temperature Heat
	Other bituminous coal	High Temperature Heat
	Sub-bituminous coal	High Temperature Heat
	Lignite	High Temperature Heat
	Peat	Medium Temperature Heat
	Patent fuel	Medium Temperature Heat
	Coke oven coke	High Temperature Heat
	Gas coke	High Temperature Heat
	Coal tar	High Temperature Heat
	BKB/peat briquettes	High Temperature Heat
	Gas works gas	High Temperature Heat
	Coke oven gas	High Temperature Heat
	Blast furnace gas	High Temperature Heat
	Other recovered gases	High Temperature Heat
	Elec/heat output from non-specified manufactured gases	High Temperature Heat
	Industrial waste	High Temperature Heat
	Municipal waste (renewable)	Medium Temperature Heat
	Municipal waste (non-renewable)	Medium Temperature Heat
	Primary solid biofuels	Low Temperature Heat
	Biogases	High Temperature Heat
	Biogasoline	High Temperature Heat
	Biodiesels	High Temperature Heat
	Other liquid biofuels	High Temperature Heat
	Non-specified primary biofuels and waste	Low Temperature Heat
	Charcoal	Low Temperature Heat
	Natural Gas	High Temperature Heat
	Crude/NGL/feedstocks (if no detail)	Medium Temperature Heat
	Crude oil	Medium Temperature Heat
	Natural gas liquids	Medium Temperature Heat
	Refinery feedstocks	Medium Temperature Heat
	Additives/blending components	Medium Temperature Heat
	Other hydrocarbons	Medium Temperature Heat
	Refinery gas	Medium Temperature Heat
	Ethane	Medium Temperature Heat
	Liquefied petroleum gases (LPG)	Medium Temperature Heat
	Motor gasoline	Transport
	Transport gasoline	Transport
	Gasoline type jet fuel	Transport
	Kerosene type jet fuel	Transport
	Other Kerosene	Medium Temperature Heat
	Gas/diesel oil	Stationary Mechanical Drive
	Fuel oil	Medium Temperature Heat
	Naphtha	Medium Temperature Heat
	White spirit & SBP	Medium Temperature Heat
	Lubricants	Medium Temperature Heat
	Bitumen	Medium Temperature Heat
	Paraffin waxes	Medium Temperature Heat
	Petroleum coke	Medium Temperature Heat
	Non-specified oil products	Medium Temperature Heat
	Heat output from non-specified combustible fuels	Medium Temperature Heat
	Geothermal	Medium Temperature Heat
	Solar thermal	Low Temperature Heat
	Other sources	Medium Temperature Heat
	Electricity	Electricity – Industry
	Heat	Medium Temperature Heat
Transport equipment	Hard coal (if no detail)	Medium Temperature Heat
	Brown coal (if no detail)	Medium Temperature Heat
	Anthracite	Medium Temperature Heat
	Coking coal	Medium Temperature Heat
	Other bituminous coal	Medium Temperature Heat
	Sub-bituminous coal	Medium Temperature Heat
	Lignite	Medium Temperature Heat
	Peat	Medium Temperature Heat
	Patent fuel	Medium Temperature Heat
	Coke oven coke	High Temperature Heat
	Gas coke	High Temperature Heat
	Coal tar	High Temperature Heat
	BKB/peat briquettes	High Temperature Heat
	Gas works gas	High Temperature Heat
	Coke oven gas	High Temperature Heat
	Blast furnace gas	High Temperature Heat
	Other recovered gases	High Temperature Heat
	Elec/heat output from non-specified manufactured gases	High Temperature Heat
	Industrial waste	Medium Temperature Heat
	Municipal waste (renewable)	Medium Temperature Heat
	Municipal waste (non-renewable)	Medium Temperature Heat
	Primary solid biofuels	Low Temperature Heat
	Biogases	High Temperature Heat
	Biogasoline	High Temperature Heat
	Biodiesels	High Temperature Heat
	Other liquid biofuels	High Temperature Heat
	Non-specified primary biofuels and waste	Low Temperature Heat
	Charcoal	Low Temperature Heat
	Natural Gas	High Temperature Heat
	Crude/NGL/feedstocks (if no detail)	Medium Temperature Heat
	Crude oil	Medium Temperature Heat
	Natural gas liquids	Medium Temperature Heat
	Refinery feedstocks	Medium Temperature Heat
	Additives/blending components	Medium Temperature Heat
	Other hydrocarbons	Medium Temperature Heat
	Refinery gas	Medium Temperature Heat
	Ethane	Medium Temperature Heat
	Liquefied petroleum gases (LPG)	Medium Temperature Heat
	Motor gasoline	Transport
	Transport gasoline	Transport
	Gasoline type jet fuel	Transport
	Kerosene type jet fuel	Transport
	Other Kerosene	Medium Temperature Heat
	Gas/diesel oil	Stationary Mechanical Drive
	Fuel oil	Medium Temperature Heat
	Naphtha	Medium Temperature Heat
	White spirit & SBP	Medium Temperature Heat
	Lubricants	Medium Temperature Heat
	Bitumen	Medium Temperature Heat
	Paraffin waxes	Medium Temperature Heat
	Petroleum coke	Medium Temperature Heat
	Non-specified oil products	Medium Temperature Heat
	Heat output from non-specified combustible fuels	Medium Temperature Heat
	Geothermal	Medium Temperature Heat
	Solar thermal	Low Temperature Heat
	Other sources	Medium Temperature Heat
	Electricity	Electricity – Industry
	Heat	Medium Temperature Heat
Machinery	Hard coal (if no detail)	Medium Temperature Heat
	Brown coal (if no detail)	Medium Temperature Heat
	Anthracite	Medium Temperature Heat
	Coking coal	Medium Temperature Heat
	Other bituminous coal	Medium Temperature Heat
	Sub-bituminous coal	Medium Temperature Heat
	Lignite	Medium Temperature Heat
	Peat	Medium Temperature Heat
	Patent fuel	Medium Temperature Heat
	Coke oven coke	High Temperature Heat
	Gas coke	High Temperature Heat
	Coal tar	High Temperature Heat
	BKB/peat briquettes	High Temperature Heat
	Gas works gas	High Temperature Heat
	Coke oven gas	High Temperature Heat
	Blast furnace gas	High Temperature Heat
	Other recovered gases	High Temperature Heat
	Elec/heat output from non-specified manufactured gases	High Temperature Heat
	Industrial waste	Medium Temperature Heat
	Municipal waste (renewable)	Medium Temperature Heat
	Municipal waste (non-renewable)	Medium Temperature Heat
	Primary solid biofuels	Low Temperature Heat
	Biogases	High Temperature Heat
	Biogasoline	High Temperature Heat
	Biodiesels	High Temperature Heat
	Other liquid biofuels	High Temperature Heat
	Non-specified primary biofuels and waste	Low Temperature Heat
	Charcoal	Low Temperature Heat
	Natural Gas	High Temperature Heat
	Crude/NGL/feedstocks (if no detail)	Medium Temperature Heat
	Crude oil	Medium Temperature Heat
	Natural gas liquids	Medium Temperature Heat
	Refinery feedstocks	Medium Temperature Heat
	Additives/blending components	Medium Temperature Heat
	Other hydrocarbons	Medium Temperature Heat
	Refinery gas	Medium Temperature Heat
	Ethane	Medium Temperature Heat
	Liquefied petroleum gases (LPG)	Medium Temperature Heat
	Motor gasoline	Transport
	Transport gasoline	Transport
	Gasoline type jet fuel	Transport
	Kerosene type jet fuel	Transport
	Other Kerosene	Medium Temperature Heat
	Gas/diesel oil	Stationary Mechanical Drive
	Fuel oil	Medium Temperature Heat
	Naphtha	Medium Temperature Heat
	White spirit & SBP	Medium Temperature Heat
	Lubricants	Medium Temperature Heat
	Bitumen	Medium Temperature Heat
	Paraffin waxes	Medium Temperature Heat
	Petroleum coke	Medium Temperature Heat
	Non-specified oil products	Medium Temperature Heat
	Heat output from non-specified combustible fuels	Medium Temperature Heat
	Geothermal	Medium Temperature Heat
	Solar thermal	Low Temperature Heat
	Other sources	Medium Temperature Heat
	Electricity	Electricity – Industry
	Heat	Medium Temperature Heat
Mining and quarrying	Hard coal (if no detail)	Medium Temperature Heat
	Brown coal (if no detail)	Medium Temperature Heat
	Anthracite	Medium Temperature Heat
	Coking coal	Medium Temperature Heat
	Other bituminous coal	Medium Temperature Heat
	Sub-bituminous coal	Medium Temperature Heat
	Lignite	Medium Temperature Heat
	Peat	Medium Temperature Heat
	Patent fuel	Medium Temperature Heat
	Coke oven coke	High Temperature Heat
	Gas coke	High Temperature Heat
	Coal tar	High Temperature Heat
	BKB/peat briquettes	High Temperature Heat
	Gas works gas	High Temperature Heat
	Coke oven gas	High Temperature Heat
	Blast furnace gas	High Temperature Heat
	Other recovered gases	High Temperature Heat
	Elec/heat output from non-specified manufactured gases	High Temperature Heat
	Industrial waste	Medium Temperature Heat
	Municipal waste (renewable)	Medium Temperature Heat
	Municipal waste (non-renewable)	Medium Temperature Heat
	Primary solid biofuels	Low Temperature Heat
	Biogases	High Temperature Heat
	Biogasoline	High Temperature Heat
	Biodiesels	High Temperature Heat
	Other liquid biofuels	High Temperature Heat
	Non-specified primary biofuels and waste	Low Temperature Heat
	Charcoal	Low Temperature Heat
	Natural Gas	High Temperature Heat
	Crude/NGL/feedstocks (if no detail)	Medium Temperature Heat
	Crude oil	Medium Temperature Heat
	Natural gas liquids	Medium Temperature Heat
	Refinery feedstocks	Medium Temperature Heat
	Additives/blending components	Medium Temperature Heat
	Other hydrocarbons	Medium Temperature Heat
	Refinery gas	Medium Temperature Heat
	Ethane	Medium Temperature Heat
	Liquefied petroleum gases (LPG)	Medium Temperature Heat
	Motor gasoline	Transport
	Transport gasoline	Transport
	Gasoline type jet fuel	Transport
	Kerosene type jet fuel	Transport
	Other Kerosene	Medium Temperature Heat
	Gas/diesel oil	Stationary Mechanical Drive
	Fuel oil	Medium Temperature Heat
	Naphtha	Medium Temperature Heat
	White spirit & SBP	Medium Temperature Heat
	Lubricants	Medium Temperature Heat
	Bitumen	Medium Temperature Heat
	Paraffin waxes	Medium Temperature Heat
	Petroleum coke	Medium Temperature Heat
	Non-specified oil products	Medium Temperature Heat
	Heat output from non-specified combustible fuels	Medium Temperature Heat
	Geothermal	Medium Temperature Heat
	Solar thermal	Low Temperature Heat
	Other sources	Medium Temperature Heat
	Electricity	Electricity – Industry
	Heat	Medium Temperature Heat
Food and tobacco	Hard coal (if no detail)	Low Temperature Heat
	Brown coal (if no detail)	Low Temperature Heat
	Anthracite	Low Temperature Heat
	Coking coal	Low Temperature Heat
	Other bituminous coal	Low Temperature Heat
	Sub-bituminous coal	Low Temperature Heat
	Lignite	Low Temperature Heat
	Peat	Low Temperature Heat
	Patent fuel	Low Temperature Heat
	Coke oven coke	Low Temperature Heat
	Gas coke	Low Temperature Heat
	Coal tar	Low Temperature Heat
	BKB/peat briquettes	Low Temperature Heat
	Gas works gas	Low Temperature Heat
	Coke oven gas	Low Temperature Heat
	Blast furnace gas	Low Temperature Heat
	Other recovered gases	Low Temperature Heat
	Elec/heat output from non-specified manufactured gases	Low Temperature Heat
	Industrial waste	Low Temperature Heat
	Municipal waste (renewable)	Low Temperature Heat
	Municipal waste (non-renewable)	Low Temperature Heat
	Primary solid biofuels	Low Temperature Heat
	Biogases	Low Temperature Heat
	Biogasoline	Low Temperature Heat
	Biodiesels	Low Temperature Heat
	Other liquid biofuels	Low Temperature Heat
	Non-specified primary biofuels and waste	Low Temperature Heat
	Charcoal	Low Temperature Heat
	Natural Gas	Low Temperature Heat
	Crude/NGL/feedstocks (if no detail)	Low Temperature Heat
	Crude oil	Low Temperature Heat
	Natural gas liquids	Low Temperature Heat
	Refinery feedstocks	Low Temperature Heat
	Additives/blending components	Low Temperature Heat
	Other hydrocarbons	Low Temperature Heat
	Refinery gas	Low Temperature Heat
	Ethane	Low Temperature Heat
	Liquefied petroleum gases (LPG)	Low Temperature Heat
	Motor gasoline	Transport
	Transport gasoline	Transport
	Gasoline type jet fuel	Transport
	Kerosene type jet fuel	Transport
	Other Kerosene	Transport
	Gas/diesel oil	Transport
	Fuel oil	Low Temperature Heat
	Naphtha	Low Temperature Heat
	White spirit & SBP	Low Temperature Heat
	Lubricants	Low Temperature Heat
	Bitumen	Low Temperature Heat
	Paraffin waxes	Low Temperature Heat
	Petroleum coke	Low Temperature Heat
	Non-specified oil products	Low Temperature Heat
	Heat output from non-specified combustible fuels	Low Temperature Heat
	Geothermal	Low Temperature Heat
	Solar thermal	Low Temperature Heat
	Electricity	Electricity – Industry
	Heat	Low Temperature Heat
Paper, pulp and print	Hard coal (if no detail)	Low Temperature Heat
	Brown coal (if no detail)	Low Temperature Heat
	Anthracite	Low Temperature Heat
	Coking coal	Low Temperature Heat
	Other bituminous coal	Low Temperature Heat
	Sub-bituminous coal	Low Temperature Heat
	Lignite	Low Temperature Heat
	Peat	Low Temperature Heat
	Patent fuel	Low Temperature Heat
	Coke oven coke	Medium Temperature Heat
	Gas coke	Medium Temperature Heat
	Coal tar	Medium Temperature Heat
	BKB/peat briquettes	Medium Temperature Heat
	Gas works gas	Medium Temperature Heat
	Coke oven gas	Medium Temperature Heat
	Blast furnace gas	Medium Temperature Heat
	Other recovered gases	Medium Temperature Heat
	Elec/heat output from non-specified manufactured gases	Medium Temperature Heat
	Industrial waste	Low Temperature Heat
	Municipal waste (renewable)	Low Temperature Heat
	Municipal waste (non-renewable)	Low Temperature Heat
	Primary solid biofuels	Low Temperature Heat
	Biogases	Low Temperature Heat
	Biogasoline	Low Temperature Heat
	Biodiesels	Low Temperature Heat
	Other liquid biofuels	Low Temperature Heat
	Non-specified primary biofuels and waste	Low Temperature Heat
	Charcoal	Low Temperature Heat
	Natural Gas	Medium Temperature Heat
	Crude/NGL/feedstocks (if no detail)	Low Temperature Heat
	Crude oil	Low Temperature Heat
	Natural gas liquids	Medium Temperature Heat
	Refinery feedstocks	Low Temperature Heat
	Additives/blending components	Low Temperature Heat
	Other hydrocarbons	Low Temperature Heat
	Refinery gas	Low Temperature Heat
	Ethane	Low Temperature Heat
	Liquefied petroleum gases (LPG)	Low Temperature Heat
	Motor gasoline	Transport
	Transport gasoline	Transport
	Gasoline type jet fuel	Transport
	Kerosene type jet fuel	Transport
	Other Kerosene	Transport
	Gas/diesel oil	Transport
	Fuel oil	Low Temperature Heat
	Naphtha	Low Temperature Heat
	White spirit & SBP	Low Temperature Heat
	Lubricants	Low Temperature Heat
	Bitumen	Low Temperature Heat
	Paraffin waxes	Low Temperature Heat
	Petroleum coke	Low Temperature Heat
	Non-specified oil products	Low Temperature Heat
	Heat output from non-specified combustible fuels	Low Temperature Heat
	Geothermal	Low Temperature Heat
	Solar thermal	Low Temperature Heat
	Electricity	Electricity – Industry
	Heat	Low Temperature Heat
Wood and wood products	Hard coal (if no detail)	Low Temperature Heat
	Brown coal (if no detail)	Low Temperature Heat
	Anthracite	Low Temperature Heat
	Coking coal	Low Temperature Heat
	Other bituminous coal	Low Temperature Heat
	Sub-bituminous coal	Low Temperature Heat
	Lignite	Low Temperature Heat
	Peat	Low Temperature Heat
	Patent fuel	Low Temperature Heat
	Coke oven coke	Medium Temperature Heat
	Gas coke	Medium Temperature Heat
	Coal tar	Medium Temperature Heat
	BKB/peat briquettes	Medium Temperature Heat
	Gas works gas	Medium Temperature Heat
	Coke oven gas	Medium Temperature Heat
	Blast furnace gas	Medium Temperature Heat
	Other recovered gases	Medium Temperature Heat
	Elec/heat output from non-specified manufactured gases	Medium Temperature Heat
	Industrial waste	Low Temperature Heat
	Municipal waste (renewable)	Low Temperature Heat
	Municipal waste (non-renewable)	Low Temperature Heat
	Primary solid biofuels	Low Temperature Heat
	Biogases	Low Temperature Heat
	Biogasoline	Low Temperature Heat
	Biodiesels	Low Temperature Heat
	Other liquid biofuels	Low Temperature Heat
	Non-specified primary biofuels and waste	Low Temperature Heat
	Charcoal	Low Temperature Heat
	Natural Gas	Medium Temperature Heat
	Crude/NGL/feedstocks (if no detail)	Low Temperature Heat
	Crude oil	Low Temperature Heat
	Natural gas liquids	Medium Temperature Heat
	Refinery feedstocks	Low Temperature Heat
	Additives/blending components	Low Temperature Heat
	Other hydrocarbons	Low Temperature Heat
	Refinery gas	Low Temperature Heat
	Ethane	Low Temperature Heat
	Liquefied petroleum gases (LPG)	Low Temperature Heat
	Motor gasoline	Transport
	Transport gasoline	Transport
	Gasoline type jet fuel	Transport
	Kerosene type jet fuel	Transport
	Other Kerosene	Transport
	Gas/diesel oil	Transport
	Fuel oil	Low Temperature Heat
	Naphtha	Low Temperature Heat
	White spirit & SBP	Low Temperature Heat
	Lubricants	Low Temperature Heat
	Bitumen	Low Temperature Heat
	Paraffin waxes	Low Temperature Heat
	Petroleum coke	Low Temperature Heat
	Non-specified oil products	Low Temperature Heat
	Heat output from non-specified combustible fuels	Low Temperature Heat
	Geothermal	Low Temperature Heat
	Solar thermal	Low Temperature Heat
	Electricity	Electricity – Industry
	Heat	Low Temperature Heat
Construction	Hard coal (if no detail)	Low Temperature Heat
	Brown coal (if no detail)	Low Temperature Heat
	Anthracite	Low Temperature Heat
	Coking coal	Low Temperature Heat
	Other bituminous coal	Low Temperature Heat
	Sub-bituminous coal	Low Temperature Heat
	Lignite	Low Temperature Heat
	Peat	Low Temperature Heat
	Patent fuel	Low Temperature Heat
	Coke oven coke	Medium Temperature Heat
	Gas coke	Medium Temperature Heat
	Coal tar	Medium Temperature Heat
	BKB/peat briquettes	Medium Temperature Heat
	Gas works gas	Medium Temperature Heat
	Coke oven gas	Medium Temperature Heat
	Blast furnace gas	Medium Temperature Heat
	Other recovered gases	Medium Temperature Heat
	Elec/heat output from non-specified manufactured gases	Medium Temperature Heat
	Industrial waste	Low Temperature Heat
	Municipal waste (renewable)	Low Temperature Heat
	Municipal waste (non-renewable)	Low Temperature Heat
	Primary solid biofuels	Low Temperature Heat
	Biogases	Low Temperature Heat
	Biogasoline	Low Temperature Heat
	Biodiesels	Low Temperature Heat
	Other liquid biofuels	Low Temperature Heat
	Non-specified primary biofuels and waste	Low Temperature Heat
	Charcoal	Low Temperature Heat
	Natural Gas	Medium Temperature Heat
	Crude/NGL/feedstocks (if no detail)	Low Temperature Heat
	Crude oil	Low Temperature Heat
	Natural gas liquids	Medium Temperature Heat
	Refinery feedstocks	Low Temperature Heat
	Additives/blending components	Low Temperature Heat
	Other hydrocarbons	Low Temperature Heat
	Refinery gas	Low Temperature Heat
	Ethane	Low Temperature Heat
	Liquefied petroleum gases (LPG)	Low Temperature Heat
	Motor gasoline	Transport
	Transport gasoline	Transport
	Gasoline type jet fuel	Transport
	Kerosene type jet fuel	Transport
	Other Kerosene	Transport
	Gas/diesel oil	Transport
	Fuel oil	Low Temperature Heat
	Naphtha	Low Temperature Heat
	White spirit & SBP	Low Temperature Heat
	Lubricants	Low Temperature Heat
	Bitumen	Low Temperature Heat
	Paraffin waxes	Low Temperature Heat
	Petroleum coke	Low Temperature Heat
	Non-specified oil products	Low Temperature Heat
	Heat output from non-specified combustible fuels	Low Temperature Heat
	Geothermal	Low Temperature Heat
	Solar thermal	Low Temperature Heat
	Electricity	Electricity – Industry
	Heat	Low Temperature Heat
Textile and leather	Hard coal (if no detail)	Low Temperature Heat
	Brown coal (if no detail)	Low Temperature Heat
	Anthracite	Low Temperature Heat
	Coking coal	Low Temperature Heat
	Other bituminous coal	Low Temperature Heat
	Sub-bituminous coal	Low Temperature Heat
	Lignite	Low Temperature Heat
	Peat	Low Temperature Heat
	Patent fuel	Low Temperature Heat
	Coke oven coke	Medium Temperature Heat
	Gas coke	Medium Temperature Heat
	Coal tar	Medium Temperature Heat
	BKB/peat briquettes	Medium Temperature Heat
	Gas works gas	Medium Temperature Heat
	Coke oven gas	Medium Temperature Heat
	Blast furnace gas	Medium Temperature Heat
	Other recovered gases	Medium Temperature Heat
	Elec/heat output from non-specified manufactured gases	Medium Temperature Heat
	Industrial waste	Low Temperature Heat
	Municipal waste (renewable)	Low Temperature Heat
	Municipal waste (non-renewable)	Low Temperature Heat
	Primary solid biofuels	Low Temperature Heat
	Biogases	Low Temperature Heat
	Biogasoline	Low Temperature Heat
	Biodiesels	Low Temperature Heat
	Other liquid biofuels	Low Temperature Heat
	Non-specified primary biofuels and waste	Low Temperature Heat
	Charcoal	Low Temperature Heat
	Natural Gas	Medium Temperature Heat
	Crude/NGL/feedstocks (if no detail)	Low Temperature Heat
	Crude oil	Low Temperature Heat
	Natural gas liquids	Medium Temperature Heat
	Refinery feedstocks	Low Temperature Heat
	Additives/blending components	Low Temperature Heat
	Other hydrocarbons	Low Temperature Heat
	Refinery gas	Low Temperature Heat
	Ethane	Low Temperature Heat
	Liquefied petroleum gases (LPG)	Low Temperature Heat
	Motor gasoline	Transport
	Transport gasoline	Transport
	Gasoline type jet fuel	Transport
	Kerosene type jet fuel	Transport
	Other Kerosene	Transport
	Gas/diesel oil	Stationary Mechanical Drive
	Fuel oil	Low Temperature Heat
	Naphtha	Low Temperature Heat
	White spirit & SBP	Low Temperature Heat
	Lubricants	Low Temperature Heat
	Bitumen	Low Temperature Heat
	Paraffin waxes	Low Temperature Heat
	Petroleum coke	Low Temperature Heat
	Non-specified oil products	Low Temperature Heat
	Heat output from non-specified combustible fuels	Low Temperature Heat
	Geothermal	Low Temperature Heat
	Solar thermal	Low Temperature Heat
	Electricity	Electricity – Industry
	Heat	Low Temperature Heat
Non-specified (industry)	Hard coal (if no detail)	Medium Temperature Heat
	Brown coal (if no detail)	Medium Temperature Heat
	Anthracite	Medium Temperature Heat
	Coking coal	Medium Temperature Heat
	Other bituminous coal	Medium Temperature Heat
	Sub-bituminous coal	Medium Temperature Heat
	Lignite	Medium Temperature Heat
	Peat	Medium Temperature Heat
	Patent fuel	Medium Temperature Heat
	Coke oven coke	High Temperature Heat
	Gas coke	High Temperature Heat
	Coal tar	High Temperature Heat
	BKB/peat briquettes	High Temperature Heat
	Gas works gas	High Temperature Heat
	Coke oven gas	High Temperature Heat
	Blast furnace gas	High Temperature Heat
	Other recovered gases	High Temperature Heat
	Elec/heat output from non-specified manufactured gases	High Temperature Heat
	Industrial waste	Medium Temperature Heat
	Municipal waste (renewable)	Medium Temperature Heat
	Municipal waste (non-renewable)	Medium Temperature Heat
	Primary solid biofuels	Low Temperature Heat
	Biogases	High Temperature Heat
	Biogasoline	High Temperature Heat
	Biodiesels	High Temperature Heat
	Other liquid biofuels	High Temperature Heat
	Non-specified primary biofuels and waste	Low Temperature Heat
	Charcoal	Low Temperature Heat
	Natural Gas	High Temperature Heat
	Crude/NGL/feedstocks (if no detail)	Medium Temperature Heat
	Crude oil	Medium Temperature Heat
	Natural gas liquids	Medium Temperature Heat
	Refinery feedstocks	Medium Temperature Heat
	Additives/blending components	Medium Temperature Heat
	Other hydrocarbons	Medium Temperature Heat
	Refinery gas	Medium Temperature Heat
	Ethane	Medium Temperature Heat
	Liquefied petroleum gases (LPG)	Medium Temperature Heat
	Motor gasoline	Transport
	Transport gasoline	Transport
	Gasoline type jet fuel	Transport
	Kerosene type jet fuel	Transport
	Other Kerosene	Medium Temperature Heat
	Gas/diesel oil	Stationary Mechanical Drive
	Fuel oil	Medium Temperature Heat
	Naphtha	Medium Temperature Heat
	White spirit & SBP	Medium Temperature Heat
	Lubricants	Medium Temperature Heat
	Bitumen	Medium Temperature Heat
	Paraffin waxes	Medium Temperature Heat
	Petroleum coke	Medium Temperature Heat
	Non-specified oil products	Medium Temperature Heat
	Heat output from non-specified combustible fuels	Medium Temperature Heat
	Geothermal	Medium Temperature Heat
	Solar thermal	Low Temperature Heat
	Other sources	Medium Temperature Heat
	Electricity	Electricity – Industry
	Heat	Medium Temperature Heat
Transport
World Transport bunkers	Hard coal (if no detail)	Transport
	Brown coal (if no detail)	Transport
	Anthracite	Transport
	Coking coal	Transport
	Other bituminous coal	Transport
	Sub-bituminous coal	Transport
	Lignite	Transport
	Peat	Transport
	Patent fuel	Transport
	Coke oven coke	Transport
	Gas coke	Transport
	Coal tar	Transport
	BKB/peat briquettes	Transport
	Gas works gas	Transport
	Coke oven gas	Transport
	Blast furnace gas	Transport
	Other recovered gases	Transport
	Elec/heat output from non-specified manufactured gases	Transport
	Industrial waste	Transport
	Municipal waste (renewable)	Transport
	Municipal waste (non-renewable)	Transport
	Primary solid biofuels	Transport
	Biogases	Transport
	Biogasoline	Transport
	Biodiesels	Transport
	Other liquid biofuels	Transport
	Non-specified primary biofuels and waste	Transport
	Charcoal	Transport
	Natural Gas	Transport
	Crude/NGL/feedstocks (if no detail)	Transport
	Crude oil	Transport
	Natural gas liquids	Transport
	Refinery feedstocks	Transport
	Additives/blending components	Transport
	Other hydrocarbons	Transport
	Refinery gas	Transport
	Ethane	Transport
	Liquefied petroleum gases (LPG)	Transport
	Motor gasoline	Transport
	Transport gasoline	Transport
	Gasoline type jet fuel	Transport
	Kerosene type jet fuel	Transport
	Other Kerosene	Transport
	Gas/diesel oil	Transport
	Fuel oil	Transport
	Naphtha	Transport
	White spirit & SBP	Transport
	Lubricants	Transport
	Bitumen	Transport
	Paraffin waxes	Transport
	Petroleum coke	Transport
	Non-specified oil products	Transport
	Heat output from non-specified combustible fuels	Transport
	Geothermal	Transport
	Solar photovoltaics	Transport
	Solar thermal	Transport
	Tide, wave and ocean	Transport
	Wind	Transport
	Other sources	Transport
	Electricity	Transport
	Heat	Transport
Domestic Transport	Hard coal (if no detail)	Transport
	Brown coal (if no detail)	Transport
	Anthracite	Transport
	Coking coal	Transport
	Other bituminous coal	Transport
	Sub-bituminous coal	Transport
	Lignite	Transport
	Peat	Transport
	Patent fuel	Transport
	Coke oven coke	Transport
	Gas coke	Transport
	Coal tar	Transport
	BKB/peat briquettes	Transport
	Gas works gas	Transport
	Coke oven gas	Transport
	Blast furnace gas	Transport
	Other recovered gases	Transport
	Elec/heat output from non-specified manufactured gases	Transport
	Industrial waste	Transport
	Municipal waste (renewable)	Transport
	Municipal waste (non-renewable)	Transport
	Primary solid biofuels	Transport
	Biogases	Transport
	Biogasoline	Transport
	Biodiesels	Transport
	Other liquid biofuels	Transport
	Non-specified primary biofuels and waste	Transport
	Charcoal	Transport
	Natural Gas	Transport
	Crude/NGL/feedstocks (if no detail)	Transport
	Crude oil	Transport
	Natural gas liquids	Transport
	Refinery feedstocks	Transport
	Additives/blending components	Transport
	Other hydrocarbons	Transport
	Refinery gas	Transport
	Ethane	Transport
	Liquefied petroleum gases (LPG)	Transport
	Motor gasoline	Transport
	Transport gasoline	Transport
	Gasoline type jet fuel	Transport
	Kerosene type jet fuel	Transport
	Other Kerosene	Transport
	Gas/diesel oil	Transport
	Fuel oil	Transport
	Naphtha	Transport
	White spirit & SBP	Transport
	Lubricants	Transport
	Bitumen	Transport
	Paraffin waxes	Transport
	Petroleum coke	Transport
	Non-specified oil products	Transport
	Heat output from non-specified combustible fuels	Transport
	Geothermal	Transport
	Solar photovoltaics	Transport
	Solar thermal	Transport
	Tide, wave and ocean	Transport
	Wind	Transport
	Other sources	Transport
	Electricity	Transport
	Heat	Transport
Road	Brown coal (if no detail)
	Biogases	Transport
	Biogasoline	Transport
	Biodiesels	Transport
	Other liquid biofuels	Transport
	Non-specified primary biofuels and waste	Transport
	Natural Gas	Transport
	Liquefied petroleum gases (LPG)	Transport
	Motor gasoline	Transport
	Gas/diesel oil	Transport
	Fuel oil	Transport
	Electricity	Electricity – Transports
Rail	Hard coal (if no detail)	Transport
	Brown coal (if no detail)	Transport
	Anthracite	Transport
	Coking coal	Transport
	Other bituminous coal	Transport
	Sub-bituminous coal	Transport
	Lignite	Transport
	Peat	Transport
	Patent fuel	Transport
	Coke oven coke	Transport
	Gas coke	Transport
	Coal tar	Transport
	BKB/peat briquettes	Transport
	Gas works gas	Transport
	Coke oven gas	Transport
	Blast furnace gas	Transport
	Other recovered gases	Transport
	Elec/heat output from non-specified manufactured gases	Transport
	Industrial waste	Transport
	Municipal waste (renewable)	Transport
	Municipal waste (non-renewable)	Transport
	Primary solid biofuels	Transport
	Biogases	Transport
	Biogasoline	Transport
	Biodiesels	Transport
	Other liquid biofuels	Transport
	Non-specified primary biofuels and waste	Transport
	Charcoal	Transport
	Natural Gas	Transport
	Crude/NGL/feedstocks (if no detail)	Transport
	Crude oil	Transport
	Natural gas liquids	Transport
	Refinery feedstocks	Transport
	Additives/blending components	Transport
	Other hydrocarbons	Transport
	Refinery gas	Transport
	Ethane	Transport
	Liquefied petroleum gases (LPG)	Transport
	Motor gasoline	Transport
	Transport gasoline	Transport
	Gasoline type jet fuel	Transport
	Kerosene type jet fuel	Transport
	Other Kerosene	Transport
	Gas/diesel oil	Transport
	Fuel oil	Transport
	Naphtha	Transport
	White spirit & SBP	Transport
	Lubricants	Transport
	Bitumen	Transport
	Paraffin waxes	Transport
	Petroleum coke	Transport
	Non-specified oil products	Transport
	Heat output from non-specified combustible fuels	Transport
	Other sources	Transport
	Electricity	Transport
	Heat	Transport
Pipeline transport	Hard coal (if no detail)	Stationary Mechanical Drive
	Brown coal (if no detail)	Stationary Mechanical Drive
	Anthracite	Stationary Mechanical Drive
	Coking coal	Stationary Mechanical Drive
	Other bituminous coal	Stationary Mechanical Drive
	Sub-bituminous coal	Stationary Mechanical Drive
	Lignite	Stationary Mechanical Drive
	Peat	Stationary Mechanical Drive
	Patent fuel	Stationary Mechanical Drive
	Coke oven coke	Stationary Mechanical Drive
	Gas coke	Stationary Mechanical Drive
	Coal tar	Stationary Mechanical Drive
	BKB/peat briquettes	Stationary Mechanical Drive
	Gas works gas	Stationary Mechanical Drive
	Coke oven gas	Stationary Mechanical Drive
	Blast furnace gas	Stationary Mechanical Drive
	Other recovered gases	Stationary Mechanical Drive
	Elec/heat output from non-specified manufactured gases	Stationary Mechanical Drive
	Industrial waste	Low Temperature Heat
	Municipal waste (renewable)	Low Temperature Heat
	Municipal waste (non-renewable)	Low Temperature Heat
	Primary solid biofuels	Low Temperature Heat
	Biogases	Stationary Mechanical Drive
	Biogasoline	Stationary Mechanical Drive
	Biodiesels	Stationary Mechanical Drive
	Other liquid biofuels	Stationary Mechanical Drive
	Non-specified primary biofuels and waste	Stationary Mechanical Drive
	Natural Gas	Stationary Mechanical Drive
	Crude/NGL/feedstocks (if no detail)	Stationary Mechanical Drive
	Crude oil	Stationary Mechanical Drive
	Natural gas liquids	Stationary Mechanical Drive
	Refinery feedstocks	Stationary Mechanical Drive
	Additives/blending components	Stationary Mechanical Drive
	Other hydrocarbons	Stationary Mechanical Drive
	Refinery gas	Stationary Mechanical Drive
	Ethane	Stationary Mechanical Drive
	Liquefied petroleum gases (LPG)	Stationary Mechanical Drive
	Motor gasoline	Stationary Mechanical Drive
	Transport gasoline	Stationary Mechanical Drive
	Gasoline type jet fuel	Stationary Mechanical Drive
	Kerosene type jet fuel	Stationary Mechanical Drive
	Other Kerosene	Stationary Mechanical Drive
	Gas/diesel oil	Stationary Mechanical Drive
	Fuel oil	Stationary Mechanical Drive
	Naphtha	Stationary Mechanical Drive
	White spirit & SBP	Stationary Mechanical Drive
	Lubricants	Stationary Mechanical Drive
	Bitumen	Stationary Mechanical Drive
	Paraffin waxes	Stationary Mechanical Drive
	Petroleum coke	Stationary Mechanical Drive
	Non-specified oil products	Stationary Mechanical Drive
	Heat output from non-specified combustible fuels	Stationary Mechanical Drive
	Solar thermal	Low Temperature Heat
	Electricity	Electricity – Transports
World marine bunkers	Hard coal (if no detail)	Transport
	Brown coal (if no detail)	Transport
	Anthracite	Transport
	Coking coal	Transport
	Other bituminous coal	Transport
	Sub-bituminous coal	Transport
	Lignite	Transport
	Peat	Transport
	Patent fuel	Transport
	Coke oven coke	Transport
	Gas coke	Transport
	Coal tar	Transport
	BKB/peat briquettes	Transport
	Gas works gas	Transport
	Coke oven gas	Transport
	Blast furnace gas	Transport
	Other recovered gases	Transport
	Elec/heat output from non-specified manufactured gases	Transport
	Industrial waste	Transport
	Municipal waste (renewable)	Transport
	Municipal waste (non-renewable)	Transport
	Primary solid biofuels	Transport
	Biogases	Transport
	Biogasoline	Transport
	Biodiesels	Transport
	Other liquid biofuels	Transport
	Non-specified primary biofuels and waste	Transport
	Charcoal	Transport
	Natural Gas	Transport
	Crude/NGL/feedstocks (if no detail)	Transport
	Crude oil	Transport
	Natural gas liquids	Transport
	Refinery feedstocks	Transport
	Additives/blending components	Transport
[truncated: 433 more rows]

## Sheet: B
B. Second law efficiencies by energy carrier - end-use pair for Portugal (1960-2009)
Abbreviations	End-use categories				References
LTH	Low Temperature Heat				(1)	Nakicenovic, N., Gilli, P. V., and Kurz, R. (1996). Regional and global exergy and energy efficiencies. Energy, 21(3):223 - 237.
MTH	Medium Temperature Heat				(2)	Serrenho, A. (2014). Structure and dynamics of useful work along the agriculture-industry-services transition: Portugal from 1856 to 2009. unpublished.
HTH	High Temperature Heat				(3)	Guevara, Z., Serrenho, A., Sousa, T., and Domingos, T. (2014). Insights on energy transitions in Mexico from the analysis of useful work from 1971 to 2009. unpublished.
SMD	Stationary Mechanical Drive				(4)	Fouquet, R. (2008). Heat, Power and Light: Revolutions in Energy Services. Edward Elgar Publishing.
T	Transport				(5)	Smil, V. (1994). Energy in World history (essays in World history). Westview Press.
Light	Light				(6)	Catarino, J. (2014). A comparative study of the evolution on energy e_x000E_ciency between 1960 - 2009 across 4 European countries. Master's thesis, Instituto Superior Técnico.
OE	Other Electric Uses				(7)	Ford, K. W. and Society, A. P. (1975) Efficient use of energy: A physics perspective. American Institut of Physics, New York.
Cooling	Cooling				(8)	Bastin, C., Szklo, A., and Rosa, L. P. (2010). Diffusion of new automotive technologies for improving energy efficiency in Brazil's light vehicle fleet. Energy Policy, 38(7):3586{3597.
					(9)	de Sá, F. P. L. V. (2013) Análise exergética e de trabalho útil do Brasil entre 1971 e 2009. Master' thesis, Instituto Superior Técnico.
					(10)	Warr, B., Schandl, H., and Ayres, R. U. (2008). Long term trends in resource exergy consumption and useful work supplies in the UK, 1900 to 2000. Ecological Economics, 68(1-2):126{140.
					(11)	Ayres, R. U., Ayres, L. W., and Pokrovsky, V. (2005). On the e_x000E_ciency of US electricity usage since1900. Energy, 30(7):109 - 1145.
					(12)	Brockway, P. E., Barrett, J. R., Foxon, T. J., and Steinberger, J. K. (2014). Divergence of trends in US and UK aggregate exergy efficiencies 1960-2010. Environmental science & technology, 48(16):9874 - 9881.
(a)	For the rows with '-', the efficiencies were not retrieved because the allocation made doesn't include the specified end-use for the respective energy carrier
Coal and coal products
End-use category	1960	1961	1962	1963	1964	1965	1966	1967	1968	1969	1970	1971	1972	1973	1974	1975	1976	1977	1978	1979	1980	1981	1982	1983	1984	1985	1986	1987	1988	1989	1990	1991	1992	1993	1994	1995	1996	1997	1998	1999	2000	2001	2002	2003	2004	2005	2006	2007	2008
LTH	0.102228	0.102646	0.103065	0.103484	0.103902	0.104321	0.10474	0.105158	0.105577	0.105996	0.106415	0.106833	0.107252	0.107671	0.108089	0.108508	0.108927	0.109345	0.109764	0.110183	0.110601	0.11102	0.111439	0.111857	0.112276	0.112695	0.113113	0.113532	0.113951	0.114369	0.114788	0.115207	0.115625	0.116044	0.116463	0.116882	0.1173	0.117719	0.118138	0.118556	0.118975	0.118975	0.118975	0.118975	0.118975	0.118975	0.118975	0.118975	0.118975
MTH	0.134891	0.135607	0.136325	0.137047	0.137771	0.138499	0.139229	0.139962	0.140698	0.141438	0.14218	0.142925	0.143673	0.144424	0.145178	0.145935	0.146694	0.147457	0.148223	0.148991	0.149763	0.150538	0.151315	0.152096	0.152879	0.153665	0.154455	0.155247	0.156042	0.15684	0.157641	0.158445	0.159252	0.160062	0.160875	0.161691	0.162509	0.163331	0.164156	0.164983	0.165814	0.165814	0.165814	0.165814	0.165814	0.165814	0.165814	0.165814	0.165814
HTH	0.266759	0.268174	0.269595	0.271022	0.272455	0.273893	0.275338	0.276788	0.278244	0.279705	0.281173	0.282646	0.284126	0.285611	0.287102	0.288599	0.290101	0.29161	0.293124	0.294644	0.29617	0.297701	0.299239	0.300782	0.302332	0.303887	0.305448	0.307014	0.308587	0.310165	0.311749	0.313339	0.314935	0.316537	0.318144	0.319758	0.321377	0.323002	0.324633	0.326269	0.327912	0.327912	0.327912	0.327912	0.327912	0.327912	0.327912	0.327912	0.327912
SMD	-	-	-	-	-	-	-	-	-	-	-	-	-	-	-	-	-	-	-	-	-	-	-	-	-	-	-	-	-	-	-	-	-	-	-	-	-	-	-	-	-	-	-	-	-	-	-	-	-
T	0.064138	0.0643278	0.0645175	0.0647073	0.064897	0.0650868	0.0652765	0.0654663	0.0656561	0.0658458	0.0660356	0.0662253	0.066	0.066	0.066	0.066	0.066	0.066	0.066	0.066	0.066	0.066	0.066	0.066	0.066	0.066	0.066	0.066	0.066	0.066	0.066	0.066	0.066	0.066	0.066	0.066	0.066	0.066	0.066	0.066	0.066	0.066	0.066	0.066	0.066	0.066	0.066	0.066	0.066
Light	-	-	-	-	-	-	-	-	-	-	-	-	-	-	-	-	-	-	-	-	-	-	-	-	-	-	-	-	-	-	-	-	-	-	-	-	-	-	-	-	-	-	-	-	-	-	-	-	-
OE	-	-	-	-	-	-	-	-	-	-	-	-	-	-	-	-	-	-	-	-	-	-	-	-	-	-	-	-	-	-	-	-	-	-	-	-	-	-	-	-	-	-	-	-	-	-	-	-	-
Cooling	-	-	-	-	-	-	-	-	-	-	-	-	-	-	-	-	-	-	-	-	-	-	-	-	-	-	-	-	-	-	-	-	-	-	-	-	-	-	-	-	-	-	-	-	-	-	-	-	-
Biofuels and waste
End-use category	1960	1961	1962	1963	1964	1965	1966	1967	1968	1969	1970	1971	1972	1973	1974	1975	1976	1977	1978	1979	1980	1981	1982	1983	1984	1985	1986	1987	1988	1989	1990	1991	1992	1993	1994	1995	1996	1997	1998	1999	2000	2001	2002	2003	2004	2005	2006	2007	2008
LTH	0.083701	0.0840438	0.0843866	0.0847294	0.0850722	0.085415	0.0857578	0.0861006	0.0864434	0.0867862	0.087129	0.0874718	0.0878146	0.0881574	0.0885002	0.088843	0.0891858	0.0895286	0.0898714	0.0902143	0.0905571	0.0908999	0.0912427	0.0915855	0.0919283	0.0922711	0.0926139	0.0929567	0.0932995	0.0936423	0.0939851	0.0943279	0.0946707	0.0950135	0.0953563	0.0956991	0.0960419	0.0963847	0.0967275	0.0970703	0.0974131	0.0974131	0.0974131	0.0974131	0.0974131	0.0974131	0.0974131	0.0974131	0.0974131
MTH	0.112409	0.113006	0.113604	0.114206	0.114809	0.115416	0.116024	0.116635	0.117249	0.117865	0.118483	0.119104	0.119727	0.120353	0.120981	0.121612	0.122245	0.122881	0.123519	0.12416	0.124803	0.125448	0.126096	0.126746	0.127399	0.128054	0.128712	0.129372	0.130035	0.1307	0.131368	0.132038	0.13271	0.133385	0.134062	0.134742	0.135425	0.136109	0.136797	0.137486	0.138178	0.138178	0.138178	0.138178	0.138178	0.138178	0.138178	0.138178	0.138178
HTH	0.222299	0.223479	0.224663	0.225852	0.227046	0.228244	0.229448	0.230656	0.23187	0.233088	0.234311	0.235539	0.236771	0.238009	0.239251	0.240499	0.241751	0.243008	0.24427	0.245537	0.246808	0.248085	0.249366	0.250652	0.251943	0.253239	0.25454	0.255845	0.257156	0.258471	0.259791	0.261116	0.262446	0.263781	0.26512	0.266465	0.267814	0.269168	0.270527	0.271891	0.27326	0.27326	0.27326	0.27326	0.27326	0.27326	0.27326	0.27326	0.27326
SMD	-	-	-	-	-	-	-	-	-	-	-	-	-	-	-	-	-	-	-	-	-	-	-	-	-	-	-	-	-	-	-	-	-	-	-	-	-	-	-	-	-	-	-	-	-	-	-	-	-
T	0.115016	0.115158	0.115298	0.115435	0.115569	0.115701	0.11583	0.115956	0.11608	0.116201	0.116319	0.11658	0.116835	0.117085	0.117328	0.117567	0.117799	0.118027	0.118249	0.118466	0.118678	0.118695	0.118711	0.118725	0.118737	0.118748	0.118758	0.118766	0.118773	0.118778	0.118781	0.118783	0.118784	0.118783	0.118781	0.118777	0.118771	0.118765	0.118756	0.118746	0.118735	0.118829	0.118918	0.119003	0.119083	0.119159	0.119231	0.119299	0.119363
Light	-	-	-	-	-	-	-	-	-	-	-	-	-	-	-	-	-	-	-	-	-	-	-	-	-	-	-	-	-	-	-	-	-	-	-	-	-	-	-	-	-	-	-	-	-	-	-	-	-
OE	-	-	-	-	-	-	-	-	-	-	-	-	-	-	-	-	-	-	-	-	-	-	-	-	-	-	-	-	-	-	-	-	-	-	-	-	-	-	-	-	-	-	-	-	-	-	-	-	-
Cooling	-	-	-	-	-	-	-	-	-	-	-	-	-	-	-	-	-	-	-	-	-	-	-	-	-	-	-	-	-	-	-	-	-	-	-	-	-	-	-	-	-	-	-	-	-	-	-	-	-
Biodiesels
End-use category	1960	1961	1962	1963	1964	1965	1966	1967	1968	1969	1970	1971	1972	1973	1974	1975	1976	1977	1978	1979	1980	1981	1982	1983	1984	1985	1986	1987	1988	1989	1990	1991	1992	1993	1994	1995	1996	1997	1998	1999	2000	2001	2002	2003	2004	2005	2006	2007	2008
LTH	0.083701	0.0840438	0.0843866	0.0847294	0.0850722	0.085415	0.0857578	0.0861006	0.0864434	0.0867862	0.087129	0.0874718	0.0878146	0.0881574	0.0885002	0.088843	0.0891858	0.0895286	0.0898714	0.0902143	0.0905571	0.0908999	0.0912427	0.0915855	0.0919283	0.0922711	0.0926139	0.0929567	0.0932995	0.0936423	0.0939851	0.0943279	0.0946707	0.0950135	0.0953563	0.0956991	0.0960419	0.0963847	0.0967275	0.0970703	0.0974131	0.0974131	0.0974131	0.0974131	0.0974131	0.0974131	0.0974131	0.0974131	0.0974131
MTH	0.112409	0.113006	0.113604	0.114206	0.114809	0.115416	0.116024	0.116635	0.117249	0.117865	0.118483	0.119104	0.119727	0.120353	0.120981	0.121612	0.122245	0.122881	0.123519	0.12416	0.124803	0.125448	0.126096	0.126746	0.127399	0.128054	0.128712	0.129372	0.130035	0.1307	0.131368	0.132038	0.13271	0.133385	0.134062	0.134742	0.135425	0.136109	0.136797	0.137486	0.138178	0.138178	0.138178	0.138178	0.138178	0.138178	0.138178	0.138178	0.138178
HTH	-	-	-	-	-	-	-	-	-	-	-	-	-	-	-	-	-	-	-	-	-	-	-	-	-	-	-	-	-	-	-	-	-	-	-	-	-	-	-	-	-	-	-	-	-	-	-	-	-
SMD	-	-	-	-	-	-	-	-	-	-	-	-	-	-	-	-	-	-	-	-	-	-	-	-	-	-	-	-	-	-	-	-	-	-	-	-	-	-	-	-	-	-	-	-	-	-	-	-	-
T	0.115016	0.115158	0.115298	0.115435	0.115569	0.115701	0.11583	0.115956	0.11608	0.116201	0.116319	0.11658	0.116835	0.117085	0.117328	0.117567	0.117799	0.118027	0.118249	0.118466	0.118678	0.118695	0.118711	0.118725	0.118737	0.118748	0.118758	0.118766	0.118773	0.118778	0.118781	0.118783	0.118784	0.118783	0.118781	0.118777	0.118771	0.118765	0.118756	0.118746	0.118735	0.118829	0.118918	0.119003	0.119083	0.119159	0.119231	0.119299	0.119363
Light	-	-	-	-	-	-	-	-	-	-	-	-	-	-	-	-	-	-	-	-	-	-	-	-	-	-	-	-	-	-	-	-	-	-	-	-	-	-	-	-	-	-	-	-	-	-	-	-	-
OE	-	-	-	-	-	-	-	-	-	-	-	-	-	-	-	-	-	-	-	-	-	-	-	-	-	-	-	-	-	-	-	-	-	-	-	-	-	-	-	-	-	-	-	-	-	-	-	-	-
Cooling	-	-	-	-	-	-	-	-	-	-	-	-	-	-	-	-	-	-	-	-	-	-	-	-	-	-	-	-	-	-	-	-	-	-	-	-	-	-	-	-	-	-	-	-	-	-	-	-	-
Natural gas
End-use category	1960	1961	1962	1963	1964	1965	1966	1967	1968	1969	1970	1971	1972	1973	1974	1975	1976	1977	1978	1979	1980	1981	1982	1983	1984	1985	1986	1987	1988	1989	1990	1991	1992	1993	1994	1995	1996	1997	1998	1999	2000	2001	2002	2003	2004	2005	2006	2007	2008
LTH	0.113807	0.114273	0.114739	0.115205	0.115671	0.116137	0.116604	0.11707	0.117536	0.118002	0.118468	0.118934	0.1194	0.119866	0.120332	0.120798	0.121265	0.121731	0.122197	0.122663	0.123129	0.123595	0.124061	0.124527	0.124993	0.125459	0.125926	0.126392	0.126858	0.127324	0.12779	0.128256	0.128722	0.129188	0.129654	0.130121	0.130587	0.131053	0.131519	0.131985	0.132451	0.132451	0.132451	0.132451	0.132451	0.132451	0.132451	0.132451	0.132451
MTH	0.161978	0.162837	0.1637	0.164566	0.165436	0.16631	0.167187	0.168067	0.168951	0.169839	0.17073	0.171625	0.172523	0.173425	0.17433	0.175239	0.176151	0.177067	0.177986	0.178909	0.179836	0.180766	0.1817	0.182637	0.183578	0.184522	0.18547	0.186421	0.187376	0.188334	0.189296	0.190261	0.19123	0.192203	0.193179	0.194159	0.195142	0.196129	0.197119	0.198113	0.19911	0.19911	0.19911	0.19911	0.19911	0.19911	0.19911	0.19911	0.19911
HTH	0.320325	0.322025	0.323731	0.325444	0.327165	0.328892	0.330626	0.332368	0.334116	0.335871	0.337633	0.339403	0.341179	0.342962	0.344753	0.34655	0.348354	0.350166	0.351984	0.353809	0.355642	0.357481	0.359327	0.36118	0.363041	0.364908	0.366782	0.368664	0.370552	0.372447	0.37435	0.376259	0.378175	0.380098	0.382029	0.383966	0.38591	0.387862	0.38982	0.391785	0.393757	0.393757	0.393757	0.393757	0.393757	0.393757	0.393757	0.393757	0.393757
SMD	0.08	0.08	0.08	0.08	0.08	0.08	0.08	0.08	0.08	0.08	0.08	0.08	0.08	0.08	0.08	0.08	0.08	0.08	0.08	0.08	0.08	0.08	0.08	0.08	0.08	0.08	0.08	0.08	0.08	0.08	0.08	0.08	0.08	0.08	0.08	0.08	0.08	0.08	0.08	0.08	0.08	0.08	0.08	0.08	0.08	0.08	0.08	0.08	0.08
T	0.08	0.08	0.08	0.08	0.08	0.08	0.08	0.08	0.08	0.08	0.08	0.08	0.08	0.08	0.08	0.08	0.08	0.08	0.08	0.08	0.08	0.08	0.08	0.08	0.08	0.08	0.08	0.08	0.08	0.08	0.08	0.08	0.08	0.08	0.08	0.08	0.08	0.08	0.08	0.08	0.08	0.08	0.08	0.08	0.08	0.08	0.08	0.08	0.08
Light	-	-	-	-	-	-	-	-	-	-	-	-	-	-	-	-	-	-	-	-	-	-	-	-	-	-	-	-	-	-	-	-	-	-	-	-	-	-	-	-	-	-	-	-	-	-	-	-	-
OE	-	-	-	-	-	-	-	-	-	-	-	-	-	-	-	-	-	-	-	-	-	-	-	-	-	-	-	-	-	-	-	-	-	-	-	-	-	-	-	-	-	-	-	-	-	-	-	-	-
Cooling	-	-	-	-	-	-	-	-	-	-	-	-	-	-	-	-	-	-	-	-	-	-	-	-	-	-	-	-	-	-	-	-	-	-	-	-	-	-	-	-	-	-	-	-	-	-	-	-	-
Refined gas
End-use category	1960	1961	1962	1963	1964	1965	1966	1967	1968	1969	1970	1971	1972	1973	1974	1975	1976	1977	1978	1979	1980	1981	1982	1983	1984	1985	1986	1987	1988	1989	1990	1991	1992	1993	1994	1995	1996	1997	1998	1999	2000	2001	2002	2003	2004	2005	2006	2007	2008
LTH	0.110499	0.110951	0.111404	0.111856	0.112309	0.112761	0.113214	0.113666	0.114119	0.114572	0.115024	0.115477	0.115929	0.116382	0.116834	0.117287	0.117739	0.118192	0.118645	0.119097	0.11955	0.120002	0.120455	0.120907	0.12136	0.121812	0.122265	0.122718	0.12317	0.123623	0.124075	0.124528	0.12498	0.125433	0.125885	0.126338	0.12679	0.127243	0.127696	0.128148	0.128601	0.128601	0.128601	0.128601	0.128601	0.128601	0.128601	0.128601	0.128601
MTH	0.158727	0.159569	0.160415	0.161264	0.162116	0.162972	0.163832	0.164695	0.165561	0.166431	0.167304	0.168181	0.169061	0.169944	0.170832	0.171722	0.172616	0.173514	0.174415	0.175319	0.176227	0.177139	0.178054	0.178972	0.179894	0.180819	0.181748	0.18268	0.183616	0.184555	0.185497	0.186443	0.187393	0.188346	0.189303	0.190263	0.191226	0.192193	0.193163	0.194137	0.195114	0.195114	0.195114	0.195114	0.195114	0.195114	0.195114	0.195114	0.195114
HTH	0.313897	0.315563	0.317235	0.318914	0.320599	0.322292	0.323992	0.325698	0.327411	0.329131	0.330858	0.332592	0.334333	0.33608	0.337835	0.339596	0.341364	0.343139	0.344921	0.346709	0.348505	0.350307	0.352117	0.353933	0.355756	0.357585	0.359422	0.361266	0.363116	0.364973	0.366838	0.368708	0.370586	0.372471	0.374363	0.376261	0.378166	0.380078	0.381997	0.383923	0.385856	0.385856	0.385856	0.385856	0.385856	0.385856	0.385856	0.385856	0.385856
SMD	-	-	-	-	-	-	-	-	-	-	-	-	-	-	-	-	-	-	-	-	-	-	-	-	-	-	-	-	-	-	-	-	-	-	-	-	-	-	-	-	-	-	-	-	-	-	-	-	-
T	0.08	0.08	0.08	0.08	0.08	0.08	0.08	0.08	0.08	0.08	0.08	0.08	0.08	0.08	0.08	0.08	0.08	0.08	0.08	0.08	0.08	0.08	0.08	0.08	0.08	0.08	0.08	0.08	0.08	0.08	0.08	0.08	0.08	0.08	0.08	0.08	0.08	0.08	0.08	0.08	0.08	0.08	0.08	0.08	0.08	0.08	0.08	0.08	0.08
Light	-	-	-	-	-	-	-	-	-	-	-	-	-	-	-	-	-	-	-	-	-	-	-	-	-	-	-	-	-	-	-	-	-	-	-	-	-	-	-	-	-	-	-	-	-	-	-	-	-
OE	-	-	-	-	-	-	-	-	-	-	-	-	-	-	-	-	-	-	-	-	-	-	-	-	-	-	-	-	-	-	-	-	-	-	-	-	-	-	-	-	-	-	-	-	-	-	-	-	-
Cooling	-	-	-	-	-	-	-	-	-	-	-	-	-	-	-	-	-	-	-	-	-	-	-	-	-	-	-	-	-	-	-	-	-	-	-	-	-	-	-	-	-	-	-	-	-	-	-	-	-
Ethane
End-use category	1960	1961	1962	1963	1964	1965	1966	1967	1968	1969	1970	1971	1972	1973	1974	1975	1976	1977	1978	1979	1980	1981	1982	1983	1984	1985	1986	1987	1988	1989	1990	1991	1992	1993	1994	1995	1996	1997	1998	1999	2000	2001	2002	2003	2004	2005	2006	2007	2008
LTH	0.110499	0.110951	0.111404	0.111856	0.112309	0.112761	0.113214	0.113666	0.114119	0.114572	0.115024	0.115477	0.115929	0.116382	0.116834	0.117287	0.117739	0.118192	0.118645	0.119097	0.11955	0.120002	0.120455	0.120907	0.12136	0.121812	0.122265	0.122718	0.12317	0.123623	0.124075	0.124528	0.12498	0.125433	0.125885	0.126338	0.12679	0.127243	0.127696	0.128148	0.128601	0.128601	0.128601	0.128601	0.128601	0.128601	0.128601	0.128601	0.128601
MTH	0.158727	0.159569	0.160415	0.161264	0.162116	0.162972	0.163832	0.164695	0.165561	0.166431	0.167304	0.168181	0.169061	0.169944	0.170832	0.171722	0.172616	0.173514	0.174415	0.175319	0.176227	0.177139	0.178054	0.178972	0.179894	0.180819	0.181748	0.18268	0.183616	0.184555	0.185497	0.186443	0.187393	0.188346	0.189303	0.190263	0.191226	0.192193	0.193163	0.194137	0.195114	0.195114	0.195114	0.195114	0.195114	0.195114	0.195114	0.195114	0.195114
HTH	0.313897	0.315563	0.317235	0.318914	0.320599	0.322292	0.323992	0.325698	0.327411	0.329131	0.330858	0.332592	0.334333	0.33608	0.337835	0.339596	0.341364	0.343139	0.344921	0.346709	0.348505	0.350307	0.352117	0.353933	0.355756	0.357585	0.359422	0.361266	0.363116	0.364973	0.366838	0.368708	0.370586	0.372471	0.374363	0.376261	0.378166	0.380078	0.381997	0.383923	0.385856	0.385856	0.385856	0.385856	0.385856	0.385856	0.385856	0.385856	0.385856
SMD	-	-	-	-	-	-	-	-	-	-	-	-	-	-	-	-	-	-	-	-	-	-	-	-	-	-	-	-	-	-	-	-	-	-	-	-	-	-	-	-	-	-	-	-	-	-	-	-	-
T	0.0817888	0.0818902	0.0819896	0.082087	0.0821825	0.0822761	0.0823678	0.0824576	0.0825455	0.0826315	0.0827157	0.0829013	0.0830828	0.0832601	0.0834335	0.0836029	0.0837685	0.0839302	0.0840882	0.0842425	0.0843932	0.0844054	0.0844165	0.0844265	0.0844354	0.0844433	0.0844501	0.0844558	0.0844605	0.0844641	0.0844667	0.0844682	0.0844686	0.084468	0.0844663	0.0844635	0.0844597	0.0844548	0.0844489	0.0844419	0.0844339	0.0845004	0.0845638	0.0846241	0.0846813	0.0847355	0.0847867	0.084835	0.0848805
Light	-	-	-	-	-	-	-	-	-	-	-	-	-	-	-	-	-	-	-	-	-	-	-	-	-	-	-	-	-	-	-	-	-	-	-	-	-	-	-	-	-	-	-	-	-	-	-	-	-
OE	-	-	-	-	-	-	-	-	-	-	-	-	-	-	-	-	-	-	-	-	-	-	-	-	-	-	-	-	-	-	-	-	-	-	-	-	-	-	-	-	-	-	-	-	-	-	-	-	-
Cooling	-	-	-	-	-	-	-	-	-	-	-	-	-	-	-	-	-	-	-	-	-	-	-	-	-	-	-	-	-	-	-	-	-	-	-	-	-	-	-	-	-	-	-	-	-	-	-	-	-
Liquified petroleum gases
End-use category	1960	1961	1962	1963	1964	1965	1966	1967	1968	1969	1970	1971	1972	1973	1974	1975	1976	1977	1978	1979	1980	1981	1982	1983	1984	1985	1986	1987	1988	1989	1990	1991	1992	1993	1994	1995	1996	1997	1998	1999	2000	2001	2002	2003	2004	2005	2006	2007	2008
LTH	0.110499	0.110951	0.111404	0.111856	0.112309	0.112761	0.113214	0.113666	0.114119	0.114572	0.115024	0.115477	0.115929	0.116382	0.116834	0.117287	0.117739	0.118192	0.118645	0.119097	0.11955	0.120002	0.120455	0.120907	0.12136	0.121812	0.122265	0.122718	0.12317	0.123623	0.124075	0.124528	0.12498	0.125433	0.125885	0.126338	0.12679	0.127243	0.127696	0.128148	0.128601	0.128601	0.128601	0.128601	0.128601	0.128601	0.128601	0.128601	0.128601
MTH	0.158727	0.159569	0.160415	0.161264	0.162116	0.162972	0.163832	0.164695	0.165561	0.166431	0.167304	0.168181	0.169061	0.169944	0.170832	0.171722	0.172616	0.173514	0.174415	0.175319	0.176227	0.177139	0.178054	0.178972	0.179894	0.180819	0.181748	0.18268	0.183616	0.184555	0.185497	0.186443	0.187393	0.188346	0.189303	0.190263	0.191226	0.192193	0.193163	0.194137	0.195114	0.195114	0.195114	0.195114	0.195114	0.195114	0.195114	0.195114	0.195114
HTH	0.313897	0.315563	0.317235	0.318914	0.320599	0.322292	0.323992	0.325698	0.327411	0.329131	0.330858	0.332592	0.334333	0.33608	0.337835	0.339596	0.341364	0.343139	0.344921	0.346709	0.348505	0.350307	0.352117	0.353933	0.355756	0.357585	0.359422	0.361266	0.363116	0.364973	0.366838	0.368708	0.370586	0.372471	0.374363	0.376261	0.378166	0.380078	0.381997	0.383923	0.385856	0.385856	0.385856	0.385856	0.385856	0.385856	0.385856	0.385856	0.385856
SMD	0.217408	0.218173	0.218937	0.219698	0.220458	0.221217	0.221974	0.222729	0.223482	0.224235	0.224985	0.226015	0.227039	0.228057	0.229068	0.230073	0.231073	0.232066	0.233054	0.234036	0.235013	0.235608	0.236203	0.236797	0.237392	0.237986	0.23858	0.239174	0.239768	0.240361	0.240955	0.241548	0.242141	0.242734	0.243327	0.24392	0.244513	0.245106	0.245698	0.24629	0.246883	0.247697	0.248505	0.249309	0.250107	0.250901	0.25169	0.252474	0.253254
T	0.102236	0.102363	0.102487	0.102609	0.102728	0.102845	0.10296	0.103072	0.103182	0.103289	0.103395	0.103627	0.103853	0.104075	0.104292	0.104504	0.104711	0.104913	0.10511	0.105303	0.105492	0.105507	0.105521	0.105533	0.105544	0.105554	0.105563	0.10557	0.105576	0.10558	0.105583	0.105585	0.105586	0.105585	0.105583	0.105579	0.105575	0.105569	0.105561	0.105552	0.105542	0.105626	0.105705	0.10578	0.105852	0.105919	0.105983	0.106044	0.106101
Light	-	-	-	-	-	-	-	-	-	-	-	-	-	-	-	-	-	-	-	-	-	-	-	-	-	-	-	-	-	-	-	-	-	-	-	-	-	-	-	-	-	-	-	-	-	-	-	-	-
OE	-	-	-	-	-	-	-	-	-	-	-	-	-	-	-	-	-	-	-	-	-	-	-	-	-	-	-	-	-	-	-	-	-	-	-	-	-	-	-	-	-	-	-	-	-	-	-	-	-
Cooling	0.0113736	0.0113874	0.011401	0.0114142	0.0114272	0.01144	0.0114524	0.0114647	0.0114766	0.0114883	0.0115141	0.0115393	0.0115639	0.011588	0.0116115	0.0116345	0.011657	0.0116789	0.0117004	0.0117213	0.011723	0.0117245	0.0117259	0.0117271	0.0117282	0.0117292	0.01173	0.0117306	0.0117311	0.0117315	0.0117317	0.0117317	0.0117317	0.0117314	0.011731	0.0117305	0.0117298	0.011729	0.011728	0.0117269	0.0117362	0.011745	0.0117533	0.0117613	0.0117688	0.0117759	0.0117826	0.011789	0.0117949
Motor gasoline
End-use category	1960	1961	1962	1963	1964	1965	1966	1967	1968	1969	1970	1971	1972	1973	1974	1975	1976	1977	1978	1979	1980	1981	1982	1983	1984	1985	1986	1987	1988	1989	1990	1991	1992	1993	1994	1995	1996	1997	1998	1999	2000	2001	2002	2003	2004	2005	2006	2007	2008
LTH	0.110499	0.110951	0.111404	0.111856	0.112309	0.112761	0.113214	0.113666	0.114119	0.114572	0.115024	0.115477	0.115929	0.116382	0.116834	0.117287	0.117739	0.118192	0.118645	0.119097	0.11955	0.120002	0.120455	0.120907	0.12136	0.121812	0.122265	0.122718	0.12317	0.123623	0.124075	0.124528	0.12498	0.125433	0.125885	0.126338	0.12679	0.127243	0.127696	0.128148	0.128601	0.128601	0.128601	0.128601	0.128601	0.128601	0.128601	0.128601	0.128601
MTH	0.158727	0.159569	0.160415	0.161264	0.162116	0.162972	0.163832	0.164695	0.165561	0.166431	0.167304	0.168181	0.169061	0.169944	0.170832	0.171722	0.172616	0.173514	0.174415	0.175319	0.176227	0.177139	0.178054	0.178972	0.179894	0.180819	0.181748	0.18268	0.183616	0.184555	0.185497	0.186443	0.187393	0.188346	0.189303	0.190263	0.191226	0.192193	0.193163	0.194137	0.195114	0.195114	0.195114	0.195114	0.195114	0.195114	0.195114	0.195114	0.195114
HTH	0.313897	0.315563	0.317235	0.318914	0.320599	0.322292	0.323992	0.325698	0.327411	0.329131	0.330858	0.332592	0.334333	0.33608	0.337835	0.339596	0.341364	0.343139	0.344921	0.346709	0.348505	0.350307	0.352117	0.353933	0.355756	0.357585	0.359422	0.361266	0.363116	0.364973	0.366838	0.368708	0.370586	0.372471	0.374363	0.376261	0.378166	0.380078	0.381997	0.383923	0.385856	0.385856	0.385856	0.385856	0.385856	0.385856	0.385856	0.385856	0.385856
SMD	0.217408	0.218173	0.218937	0.219698	0.220458	0.221217	0.221974	0.222729	0.223482	0.224235	0.224985	0.226015	0.227039	0.228057	0.229068	0.230073	0.231073	0.232066	0.233054	0.234036	0.235013	0.235608	0.236203	0.236797	0.237392	0.237986	0.23858	0.239174	0.239768	0.240361	0.240955	0.241548	0.242141	0.242734	0.243327	0.24392	0.244513	0.245106	0.245698	0.24629	0.246883	0.247697	0.248505	0.249309	0.250107	0.250901	0.25169	0.252474	0.253254
T	0.102236	0.102363	0.102487	0.102609	0.102728	0.102845	0.10296	0.103072	0.103182	0.103289	0.103395	0.103627	0.103853	0.104075	0.104292	0.104504	0.104711	0.104913	0.10511	0.105303	0.105492	0.105507	0.105521	0.105533	0.105544	0.105554	0.105563	0.10557	0.105576	0.10558	0.105583	0.105585	0.105586	0.105585	0.105583	0.105579	0.105575	0.105569	0.105561	0.105552	0.105542	0.105626	0.105705	0.10578	0.105852	0.105919	0.105983	0.106044	0.106101
Light	-	-	-	-	-	-	-	-	-	-	-	-	-	-	-	-	-	-	-	-	-	-	-	-	-	-	-	-	-	-	-	-	-	-	-	-	-	-	-	-	-	-	-	-	-	-	-	-	-
OE	-	-	-	-	-	-	-	-	-	-	-	-	-	-	-	-	-	-	-	-	-	-	-	-	-	-	-	-	-	-	-	-	-	-	-	-	-	-	-	-	-	-	-	-	-	-	-	-	-
Cooling	0.0113736	0.0113874	0.011401	0.0114142	0.0114272	0.01144	0.0114524	0.0114647	0.0114766	0.0114883	0.0115141	0.0115393	0.0115639	0.011588	0.0116115	0.0116345	0.011657	0.0116789	0.0117004	0.0117213	0.011723	0.0117245	0.0117259	0.0117271	0.0117282	0.0117292	0.01173	0.0117306	0.0117311	0.0117315	0.0117317	0.0117317	0.0117317	0.0117314	0.011731	0.0117305	0.0117298	0.011729	0.011728	0.0117269	0.0117362	0.011745	0.0117533	0.0117613	0.0117688	0.0117759	0.0117826	0.011789	0.0117949
Aviation gasoline
End-use category	1960	1961	1962	1963	1964	1965	1966	1967	1968	1969	1970	1971	1972	1973	1974	1975	1976	1977	1978	1979	1980	1981	1982	1983	1984	1985	1986	1987	1988	1989	1990	1991	1992	1993	1994	1995	1996	1997	1998	1999	2000	2001	2002	2003	2004	2005	2006	2007	2008
LTH	0.110499	0.110951	0.111404	0.111856	0.112309	0.112761	0.113214	0.113666	0.114119	0.114572	0.115024	0.115477	0.115929	0.116382	0.116834	0.117287	0.117739	0.118192	0.118645	0.119097	0.11955	0.120002	0.120455	0.120907	0.12136	0.121812	0.122265	0.122718	0.12317	0.123623	0.124075	0.124528	0.12498	0.125433	0.125885	0.126338	0.12679	0.127243	0.127696	0.128148	0.128601	0.128601	0.128601	0.128601	0.128601	0.128601	0.128601	0.128601	0.128601
MTH	0.158727	0.159569	0.160415	0.161264	0.162116	0.162972	0.163832	0.164695	0.165561	0.166431	0.167304	0.168181	0.169061	0.169944	0.170832	0.171722	0.172616	0.173514	0.174415	0.175319	0.176227	0.177139	0.178054	0.178972	0.179894	0.180819	0.181748	0.18268	0.183616	0.184555	0.185497	0.186443	0.187393	0.188346	0.189303	0.190263	0.191226	0.192193	0.193163	0.194137	0.195114	0.195114	0.195114	0.195114	0.195114	0.195114	0.195114	0.195114	0.195114
HTH	0.313897	0.315563	0.317235	0.318914	0.320599	0.322292	0.323992	0.325698	0.327411	0.329131	0.330858	0.332592	0.334333	0.33608	0.337835	0.339596	0.341364	0.343139	0.344921	0.346709	0.348505	0.350307	0.352117	0.353933	0.355756	0.357585	0.359422	0.361266	0.363116	0.364973	0.366838	0.368708	0.370586	0.372471	0.374363	0.376261	0.378166	0.380078	0.381997	0.383923	0.385856	0.385856	0.385856	0.385856	0.385856	0.385856	0.385856	0.385856	0.385856
SMD	0.27176	0.272716	0.273671	0.274623	0.275573	0.276521	0.277467	0.278411	0.279353	0.280293	0.281231	0.282519	0.283799	0.285071	0.286335	0.287592	0.288841	0.290083	0.291318	0.292545	0.293767	0.29451	0.295253	0.295996	0.296739	0.297482	0.298225	0.298967	0.299709	0.300451	0.301193	0.301935	0.302677	0.303418	0.304159	0.3049	0.305641	0.306382	0.307123	0.307863	0.308603	0.309621	0.310631	0.311636	0.312634	0.313626	0.314612	0.315592	0.316567
T	0.172	0.1752	0.1784	0.1816	0.1848	0.188	0.1912	0.1944	0.1976	0.2008	0.204	0.2072	0.2104	0.2136	0.2168	0.22	0.2232	0.2264	0.2296	0.2328	0.236	0.2392	0.2424	0.2456	0.2488	0.252	0.2552	0.2584	0.2616	0.2648	0.268	0.2712	0.2744	0.2776	0.2808	0.284	0.2872	0.2904	0.2936	0.2968	0.3	0.3032	0.3064	0.3096	0.3128	0.316	0.3192	0.3224	0.3256
Light	-	-	-	-	-	-	-	-	-	-	-	-	-	-	-	-	-	-	-	-	-	-	-	-	-	-	-	-	-	-	-	-	-	-	-	-	-	-	-	-	-	-	-	-	-	-	-	-	-
OE	-	-	-	-	-	-	-	-	-	-	-	-	-	-	-	-	-	-	-	-	-	-	-	-	-	-	-	-	-	-	-	-	-	-	-	-	-	-	-	-	-	-	-	-	-	-	-	-	-
Cooling	0.0113736	0.0113874	0.011401	0.0114142	0.0114272	0.01144	0.0114524	0.0114647	0.0114766	0.0114883	0.0115141	0.0115393	0.0115639	0.011588	0.0116115	0.0116345	0.011657	0.0116789	0.0117004	0.0117213	0.011723	0.0117245	0.0117259	0.0117271	0.0117282	0.0117292	0.01173	0.0117306	0.0117311	0.0117315	0.0117317	0.0117317	0.0117317	0.0117314	0.011731	0.0117305	0.0117298	0.011729	0.011728	0.0117269	0.0117362	0.011745	0.0117533	0.0117613	0.0117688	0.0117759	0.0117826	0.011789	0.0117949
Kerosene
End-use category	1960	1961	1962	1963	1964	1965	1966	1967	1968	1969	1970	1971	1972	1973	1974	1975	1976	1977	1978	1979	1980	1981	1982	1983	1984	1985	1986	1987	1988	1989	1990	1991	1992	1993	1994	1995	1996	1997	1998	1999	2000	2001	2002	2003	2004	2005	2006	2007	2008
LTH	0.110499	0.110951	0.111404	0.111856	0.112309	0.112761	0.113214	0.113666	0.114119	0.114572	0.115024	0.115477	0.115929	0.116382	0.116834	0.117287	0.117739	0.118192	0.118645	0.119097	0.11955	0.120002	0.120455	0.120907	0.12136	0.121812	0.122265	0.122718	0.12317	0.123623	0.124075	0.124528	0.12498	0.125433	0.125885	0.126338	0.12679	0.127243	0.127696	0.128148	0.128601	0.128601	0.128601	0.128601	0.128601	0.128601	0.128601	0.128601	0.128601
MTH	0.158727	0.159569	0.160415	0.161264	0.162116	0.162972	0.163832	0.164695	0.165561	0.166431	0.167304	0.168181	0.169061	0.169944	0.170832	0.171722	0.172616	0.173514	0.174415	0.175319	0.176227	0.177139	0.178054	0.178972	0.179894	0.180819	0.181748	0.18268	0.183616	0.184555	0.185497	0.186443	0.187393	0.188346	0.189303	0.190263	0.191226	0.192193	0.193163	0.194137	0.195114	0.195114	0.195114	0.195114	0.195114	0.195114	0.195114	0.195114	0.195114
HTH	0.313897	0.315563	0.317235	0.318914	0.320599	0.322292	0.323992	0.325698	0.327411	0.329131	0.330858	0.332592	0.334333	0.33608	0.337835	0.339596	0.341364	0.343139	0.344921	0.346709	0.348505	0.350307	0.352117	0.353933	0.355756	0.357585	0.359422	0.361266	0.363116	0.364973	0.366838	0.368708	0.370586	0.372471	0.374363	0.376261	0.378166	0.380078	0.381997	0.383923	0.385856	0.385856	0.385856	0.385856	0.385856	0.385856	0.385856	0.385856	0.385856
SMD	0.217408	0.218173	0.218937	0.219698	0.220458	0.221217	0.221974	0.222729	0.223482	0.224235	0.224985	0.226015	0.227039	0.228057	0.229068	0.230073	0.231073	0.232066	0.233054	0.234036	0.235013	0.235608	0.236203	0.236797	0.237392	0.237986	0.23858	0.239174	0.239768	0.240361	0.240955	0.241548	0.242141	0.242734	0.243327	0.24392	0.244513	0.245106	0.245698	0.24629	0.246883	0.247697	0.248505	0.249309	0.250107	0.250901	0.25169	0.252474	0.253254
T	0.172	0.1752	0.1784	0.1816	0.1848	0.188	0.1912	0.1944	0.1976	0.2008	0.204	0.2072	0.2104	0.2136	0.2168	0.22	0.2232	0.2264	0.2296	0.2328	0.236	0.2392	0.2424	0.2456	0.2488	0.252	0.2552	0.2584	0.2616	0.2648	0.268	0.2712	0.2744	0.2776	0.2808	0.284	0.2872	0.2904	0.2936	0.2968	0.3	0.3032	0.3064	0.3096	0.3128	0.316	0.3192	0.3224	0.3256
Light	-	-	-	-	-	-	-	-	-	-	-	-	-	-	-	-	-	-	-	-	-	-	-	-	-	-	-	-	-	-	-	-	-	-	-	-	-	-	-	-	-	-	-	-	-	-	-	-	-
OE	-	-	-	-	-	-	-	-	-	-	-	-	-	-	-	-	-	-	-	-	-	-	-	-	-	-	-	-	-	-	-	-	-	-	-	-	-	-	-	-	-	-	-	-	-	-	-	-	-
Cooling	-	-	-	-	-	-	-	-	-	-	-	-	-	-	-	-	-	-	-	-	-	-	-	-	-	-	-	-	-	-	-	-	-	-	-	-	-	-	-	-	-	-	-	-	-	-	-	-	-
Diesel
End-use category	1960	1961	1962	1963	1964	1965	1966	1967	1968	1969	1970	1971	1972	1973	1974	1975	1976	1977	1978	1979	1980	1981	1982	1983	1984	1985	1986	1987	1988	1989	1990	1991	1992	1993	1994	1995	1996	1997	1998	1999	2000	2001	2002	2003	2004	2005	2006	2007	2008
LTH	0.110499	0.110951	0.111404	0.111856	0.112309	0.112761	0.113214	0.113666	0.114119	0.114572	0.115024	0.115477	0.115929	0.116382	0.116834	0.117287	0.117739	0.118192	0.118645	0.119097	0.11955	0.120002	0.120455	0.120907	0.12136	0.121812	0.122265	0.122718	0.12317	0.123623	0.124075	0.124528	0.12498	0.125433	0.125885	0.126338	0.12679	0.127243	0.127696	0.128148	0.128601	0.128601	0.128601	0.128601	0.128601	0.128601	0.128601	0.128601	0.128601
MTH	0.158727	0.159569	0.160415	0.161264	0.162116	0.162972	0.163832	0.164695	0.165561	0.166431	0.167304	0.168181	0.169061	0.169944	0.170832	0.171722	0.172616	0.173514	0.174415	0.175319	0.176227	0.177139	0.178054	0.178972	0.179894	0.180819	0.181748	0.18268	0.183616	0.184555	0.185497	0.186443	0.187393	0.188346	0.189303	0.190263	0.191226	0.192193	0.193163	0.194137	0.195114	0.195114	0.195114	0.195114	0.195114	0.195114	0.195114	0.195114	0.195114
HTH	0.313897	0.315563	0.317235	0.318914	0.320599	0.322292	0.323992	0.325698	0.327411	0.329131	0.330858	0.332592	0.334333	0.33608	0.337835	0.339596	0.341364	0.343139	0.344921	0.346709	0.348505	0.350307	0.352117	0.353933	0.355756	0.357585	0.359422	0.361266	0.363116	0.364973	0.366838	0.368708	0.370586	0.372471	0.374363	0.376261	0.378166	0.380078	0.381997	0.383923	0.385856	0.385856	0.385856	0.385856	0.385856	0.385856	0.385856	0.385856	0.385856
SMD	0.27176	0.272716	0.273671	0.274623	0.275573	0.276521	0.277467	0.278411	0.279353	0.280293	0.281231	0.282519	0.283799	0.285071	0.286335	0.287592	0.288841	0.290083	0.291318	0.292545	0.293767	0.29451	0.295253	0.295996	0.296739	0.297482	0.298225	0.298967	0.299709	0.300451	0.301193	0.301935	0.302677	0.303418	0.304159	0.3049	0.305641	0.306382	0.307123	0.307863	0.308603	0.309621	0.310631	0.311636	0.312634	0.313626	0.314612	0.315592	0.316567
T	0.127795	0.127953	0.128109	0.128261	0.12841	0.128556	0.1287	0.12884	0.128977	0.129112	0.129243	0.129533	0.129817	0.130094	0.130365	0.13063	0.130888	0.131141	0.131388	0.131629	0.131864	0.131883	0.131901	0.131916	0.13193	0.131943	0.131953	0.131962	0.13197	0.131975	0.131979	0.131982	0.131982	0.131981	0.131979	0.131974	0.131968	0.131961	0.131951	0.131941	0.131928	0.132032	0.132131	0.132225	0.132315	0.132399	0.132479	0.132555	0.132626
Light	-	-	-	-	-	-	-	-	-	-	-	-	-	-	-	-	-	-	-	-	-	-	-	-	-	-	-	-	-	-	-	-	-	-	-	-	-	-	-	-	-	-	-	-	-	-	-	-	-
OE	-	-	-	-	-	-	-	-	-	-	-	-	-	-	-	-	-	-	-	-	-	-	-	-	-	-	-	-	-	-	-	-	-	-	-	-	-	-	-	-	-	-	-	-	-	-	-	-	-
Cooling	0.0113736	0.0113874	0.011401	0.0114142	0.0114272	0.01144	0.0114524	0.0114647	0.0114766	0.0114883	0.0115141	0.0115393	0.0115639	0.011588	0.0116115	0.0116345	0.011657	0.0116789	0.0117004	0.0117213	0.011723	0.0117245	0.0117259	0.0117271	0.0117282	0.0117292	0.01173	0.0117306	0.0117311	0.0117315	0.0117317	0.0117317	0.0117317	0.0117314	0.011731	0.0117305	0.0117298	0.011729	0.011728	0.0117269	0.0117362	0.011745	0.0117533	0.0117613	0.0117688	0.0117759	0.0117826	0.011789	0.0117949
Fuel oil
End-use category	1960	1961	1962	1963	1964	1965	1966	1967	1968	1969	1970	1971	1972	1973	1974	1975	1976	1977	1978	1979	1980	1981	1982	1983	1984	1985	1986	1987	1988	1989	1990	1991	1992	1993	1994	1995	1996	1997	1998	1999	2000	2001	2002	2003	2004	2005	2006	2007	2008
LTH	0.110499	0.110951	0.111404	0.111856	0.112309	0.112761	0.113214	0.113666	0.114119	0.114572	0.115024	0.115477	0.115929	0.116382	0.116834	0.117287	0.117739	0.118192	0.118645	0.119097	0.11955	0.120002	0.120455	0.120907	0.12136	0.121812	0.122265	0.122718	0.12317	0.123623	0.124075	0.124528	0.12498	0.125433	0.125885	0.126338	0.12679	0.127243	0.127696	0.128148	0.128601	0.128601	0.128601	0.128601	0.128601	0.128601	0.128601	0.128601	0.128601
MTH	0.158727	0.159569	0.160415	0.161264	0.162116	0.162972	0.163832	0.164695	0.165561	0.166431	0.167304	0.168181	0.169061	0.169944	0.170832	0.171722	0.172616	0.173514	0.174415	0.175319	0.176227	0.177139	0.178054	0.178972	0.179894	0.180819	0.181748	0.18268	0.183616	0.184555	0.185497	0.186443	0.187393	0.188346	0.189303	0.190263	0.191226	0.192193	0.193163	0.194137	0.195114	0.195114	0.195114	0.195114	0.195114	0.195114	0.195114	0.195114	0.195114
HTH	0.313897	0.315563	0.317235	0.318914	0.320599	0.322292	0.323992	0.325698	0.327411	0.329131	0.330858	0.332592	0.334333	0.33608	0.337835	0.339596	0.341364	0.343139	0.344921	0.346709	0.348505	0.350307	0.352117	0.353933	0.355756	0.357585	0.359422	0.361266	0.363116	0.364973	0.366838	0.368708	0.370586	0.372471	0.374363	0.376261	0.378166	0.380078	0.381997	0.383923	0.385856	0.385856	0.385856	0.385856	0.385856	0.385856	0.385856	0.385856	0.385856
SMD	-	-	-	-	-	-	-	-	-	-	-	-	-	-	-	-	-	-	-	-	-	-	-	-	-	-	-	-	-	-	-	-	-	-	-	-	-	-	-	-	-	-	-	-	-	-	-	-	-
T	0.275	0.275	0.275	0.275	0.275	0.275	0.275	0.275	0.275	0.275	0.275	0.275	0.275	0.275	0.275	0.275	0.288841	0.290083	0.291318	0.292545	0.293767	0.29451	0.295253	0.295996	0.296739	0.297482	0.298225	0.298967	0.299709	0.300451	0.301193	0.301935	0.302677	0.303418	0.304159	0.3049	0.305641	0.306382	0.307123	0.307863	0.308603	0.309621	0.310631	0.311636	0.312634	0.313626	0.314612	0.315592	0.316567
Light	-	-	-	-	-	-	-	-	-	-	-	-	-	-	-	-	-	-	-	-	-	-	-	-	-	-	-	-	-	-	-	-	-	-	-	-	-	-	-	-	-	-	-	-	-	-	-	-	-
OE	-	-	-	-	-	-	-	-	-	-	-	-	-	-	-	-	-	-	-	-	-	-	-	-	-	-	-	-	-	-	-	-	-	-	-	-	-	-	-	-	-	-	-	-	-	-	-	-	-
Cooling	0.0113736	0.0113874	0.011401	0.0114142	0.0114272	0.01144	0.0114524	0.0114647	0.0114766	0.0114883	0.0115141	0.0115393	0.0115639	0.011588	0.0116115	0.0116345	0.011657	0.0116789	0.0117004	0.0117213	0.011723	0.0117245	0.0117259	0.0117271	0.0117282	0.0117292	0.01173	0.0117306	0.0117311	0.0117315	0.0117317	0.0117317	0.0117317	0.0117314	0.011731	0.0117305	0.0117298	0.011729	0.011728	0.0117269	0.0117362	0.011745	0.0117533	0.0117613	0.0117688	0.0117759	0.0117826	0.011789	0.0117949
Distillates
End-use category	1960	1961	1962	1963	1964	1965	1966	1967	1968	1969	1970	1971	1972	1973	1974	1975	1976	1977	1978	1979	1980	1981	1982	1983	1984	1985	1986	1987	1988	1989	1990	1991	1992	1993	1994	1995	1996	1997	1998	1999	2000	2001	2002	2003	2004	2005	2006	2007	2008
LTH	0.110499	0.110951	0.111404	0.111856	0.112309	0.112761	0.113214	0.113666	0.114119	0.114572	0.115024	0.115477	0.115929	0.116382	0.116834	0.117287	0.117739	0.118192	0.118645	0.119097	0.11955	0.120002	0.120455	0.120907	0.12136	0.121812	0.122265	0.122718	0.12317	0.123623	0.124075	0.124528	0.12498	0.125433	0.125885	0.126338	0.12679	0.127243	0.127696	0.128148	0.128601	0.128601	0.128601	0.128601	0.128601	0.128601	0.128601	0.128601	0.128601
MTH	0.158727	0.159569	0.160415	0.161264	0.162116	0.162972	0.163832	0.164695	0.165561	0.166431	0.167304	0.168181	0.169061	0.169944	0.170832	0.171722	0.172616	0.173514	0.174415	0.175319	0.176227	0.177139	0.178054	0.178972	0.179894	0.180819	0.181748	0.18268	0.183616	0.184555	0.185497	0.186443	0.187393	0.188346	0.189303	0.190263	0.191226	0.192193	0.193163	0.194137	0.195114	0.195114	0.195114	0.195114	0.195114	0.195114	0.195114	0.195114	0.195114
HTH	0.313897	0.315563	0.317235	0.318914	0.320599	0.322292	0.323992	0.325698	0.327411	0.329131	0.330858	0.332592	0.334333	0.33608	0.337835	0.339596	0.341364	0.343139	0.344921	0.346709	0.348505	0.350307	0.352117	0.353933	0.355756	0.357585	0.359422	0.361266	0.363116	0.364973	0.366838	0.368708	0.370586	0.372471	0.374363	0.376261	0.378166	0.380078	0.381997	0.383923	0.385856	0.385856	0.385856	0.385856	0.385856	0.385856	0.385856	0.385856	0.385856
SMD	-	-	-	-	-	-	-	-	-	-	-	-	-	-	-	-	-	-	-	-	-	-	-	-	-	-	-	-	-	-	-	-	-	-	-	-	-	-	-	-	-	-	-	-	-	-	-	-	-
T	-	-	-	-	-	-	-	-	-	-	-	-	-	-	-	-	-	-	-	-	-	-	-	-	-	-	-	-	-	-	-	-	-	-	-	-	-	-	-	-	-	-	-	-	-	-	-	-	-
Light	-	-	-	-	-	-	-	-	-	-	-	-	-	-	-	-	-	-	-	-	-	-	-	-	-	-	-	-	-	-	-	-	-	-	-	-	-	-	-	-	-	-	-	-	-	-	-	-	-
OE	-	-	-	-	-	-	-	-	-	-	-	-	-	-	-	-	-	-	-	-	-	-	-	-	-	-	-	-	-	-	-	-	-	-	-	-	-	-	-	-	-	-	-	-	-	-	-	-	-
Cooling	-	-	-	-	-	-	-	-	-	-	-	-	-	-	-	-	-	-	-	-	-	-	-	-	-	-	-	-	-	-	-	-	-	-	-	-	-	-	-	-	-	-	-	-	-	-	-	-	-
Petroleum coke
End-use category	1960	1961	1962	1963	1964	1965	1966	1967	1968	1969	1970	1971	1972	1973	1974	1975	1976	1977	1978	1979	1980	1981	1982	1983	1984	1985	1986	1987	1988	1989	1990	1991	1992	1993	1994	1995	1996	1997	1998	1999	2000	2001	2002	2003	2004	2005	2006	2007	2008
LTH	0.110499	0.110951	0.111404	0.111856	0.112309	0.112761	0.113214	0.113666	0.114119	0.114572	0.115024	0.115477	0.115929	0.116382	0.116834	0.117287	0.117739	0.118192	0.118645	0.119097	0.11955	0.120002	0.120455	0.120907	0.12136	0.121812	0.122265	0.122718	0.12317	0.123623	0.124075	0.124528	0.12498	0.125433	0.125885	0.126338	0.12679	0.127243	0.127696	0.128148	0.128601	0.128601	0.128601	0.128601	0.128601	0.128601	0.128601	0.128601	0.128601
MTH	0.158727	0.159569	0.160415	0.161264	0.162116	0.162972	0.163832	0.164695	0.165561	0.166431	0.167304	0.168181	0.169061	0.169944	0.170832	0.171722	0.172616	0.173514	0.174415	0.175319	0.176227	0.177139	0.178054	0.178972	0.179894	0.180819	0.181748	0.18268	0.183616	0.184555	0.185497	0.186443	0.187393	0.188346	0.189303	0.190263	0.191226	0.192193	0.193163	0.194137	0.195114	0.195114	0.195114	0.195114	0.195114	0.195114	0.195114	0.195114	0.195114
HTH	0.313897	0.315563	0.317235	0.318914	0.320599	0.322292	0.323992	0.325698	0.327411	0.329131	0.330858	0.332592	0.334333	0.33608	0.337835	0.339596	0.341364	0.343139	0.344921	0.346709	0.348505	0.350307	0.352117	0.353933	0.355756	0.357585	0.359422	0.361266	0.363116	0.364973	0.366838	0.368708	0.370586	0.372471	0.374363	0.376261	0.378166	0.380078	0.381997	0.383923	0.385856	0.385856	0.385856	0.385856	0.385856	0.385856	0.385856	0.385856	0.385856
SMD	-	-	-	-	-	-	-	-	-	-	-	-	-	-	-	-	-	-	-	-	-	-	-	-	-	-	-	-	-	-	-	-	-	-	-	-	-	-	-	-	-	-	-	-	-	-	-	-	-
T	-	-	-	-	-	-	-	-	-	-	-	-	-	-	-	-	-	-	-	-	-	-	-	-	-	-	-	-	-	-	-	-	-	-	-	-	-	-	-	-	-	-	-	-	-	-	-	-	-
Light	-	-	-	-	-	-	-	-	-	-	-	-	-	-	-	-	-	-	-	-	-	-	-	-	-	-	-	-	-	-	-	-	-	-	-	-	-	-	-	-	-	-	-	-	-	-	-	-	-
OE	-	-	-	-	-	-	-	-	-	-	-	-	-	-	-	-	-	-	-	-	-	-	-	-	-	-	-	-	-	-	-	-	-	-	-	-	-	-	-	-	-	-	-	-	-	-	-	-	-
Cooling	-	-	-	-	-	-	-	-	-	-	-	-	-	-	-	-	-	-	-	-	-	-	-	-	-	-	-	-	-	-	-	-	-	-	-	-	-	-	-	-	-	-	-	-	-	-	-	-	-
Non-specified oil products
End-use category	1960	1961	1962	1963	1964	1965	1966	1967	1968	1969	1970	1971	1972	1973	1974	1975	1976	1977	1978	1979	1980	1981	1982	1983	1984	1985	1986	1987	1988	1989	1990	1991	1992	1993	1994	1995	1996	1997	1998	1999	2000	2001	2002	2003	2004	2005	2006	2007	2008
LTH	0.110499	0.110951	0.111404	0.111856	0.112309	0.112761	0.113214	0.113666	0.114119	0.114572	0.115024	0.115477	0.115929	0.116382	0.116834	0.117287	0.117739	0.118192	0.118645	0.119097	0.11955	0.120002	0.120455	0.120907	0.12136	0.121812	0.122265	0.122718	0.12317	0.123623	0.124075	0.124528	0.12498	0.125433	0.125885	0.126338	0.12679	0.127243	0.127696	0.128148	0.128601	0.128601	0.128601	0.128601	0.128601	0.128601	0.128601	0.128601	0.128601
MTH	0.158727	0.159569	0.160415	0.161264	0.162116	0.162972	0.163832	0.164695	0.165561	0.166431	0.167304	0.168181	0.169061	0.169944	0.170832	0.171722	0.172616	0.173514	0.174415	0.175319	0.176227	0.177139	0.178054	0.178972	0.179894	0.180819	0.181748	0.18268	0.183616	0.184555	0.185497	0.186443	0.187393	0.188346	0.189303	0.190263	0.191226	0.192193	0.193163	0.194137	0.195114	0.195114	0.195114	0.195114	0.195114	0.195114	0.195114	0.195114	0.195114
HTH	0.313897	0.315563	0.317235	0.318914	0.320599	0.322292	0.323992	0.325698	0.327411	0.329131	0.330858	0.332592	0.334333	0.33608	0.337835	0.339596	0.341364	0.343139	0.344921	0.346709	0.348505	0.350307	0.352117	0.353933	0.355756	0.357585	0.359422	0.361266	0.363116	0.364973	0.366838	0.368708	0.370586	0.372471	0.374363	0.376261	0.378166	0.380078	0.381997	0.383923	0.385856	0.385856	0.385856	0.385856	0.385856	0.385856	0.385856	0.385856	0.385856
SMD	-	-	-	-	-	-	-	-	-	-	-	-	-	-	-	-	-	-	-	-	-	-	-	-	-	-	-	-	-	-	-	-	-	-	-	-	-	-	-	-	-	-	-	-	-	-	-	-	-
T	0.102236	0.102363	0.102487	0.102609	0.102728	0.102845	0.10296	0.103072	0.103182	0.103289	0.103395	0.103627	0.103853	0.104075	0.104292	0.104504	0.104711	0.104913	0.10511	0.105303	0.105492	0.105507	0.105521	0.105533	0.105544	0.105554	0.105563	0.10557	0.105576	0.10558	0.105583	0.105585	0.105586	0.105585	0.105583	0.105579	0.105575	0.105569	0.105561	0.105552	0.105542	0.105626	0.105705	0.10578	0.105852	0.105919	0.105983	0.106044	0.106101
Light	-	-	-	-	-	-	-	-	-	-	-	-	-	-	-	-	-	-	-	-	-	-	-	-	-	-	-	-	-	-	-	-	-	-	-	-	-	-	-	-	-	-	-	-	-	-	-	-	-
OE	-	-	-	-	-	-	-	-	-	-	-	-	-	-	-	-	-	-	-	-	-	-	-	-	-	-	-	-	-	-	-	-	-	-	-	-	-	-	-	-	-	-	-	-	-	-	-	-	-
Cooling	-	-	-	-	-	-	-	-	-	-	-	-	-	-	-	-	-	-	-	-	-	-	-	-	-	-	-	-	-	-	-	-	-	-	-	-	-	-	-	-	-	-	-	-	-	-	-	-	-
Geothermal
End-use category	1960	1961	1962	1963	1964	1965	1966	1967	1968	1969	1970	1971	1972	1973	1974	1975	1976	1977	1978	1979	1980	1981	1982	1983	1984	1985	1986	1987	1988	1989	1990	1991	1992	1993	1994	1995	1996	1997	1998	1999	2000	2001	2002	2003	2004	2005	2006	2007	2008
LTH	0.153672	0.154302	0.154931	0.155561	0.15619	0.156819	0.157449	0.158078	0.158707	0.159337	0.159966	0.160596	0.161225	0.161854	0.162484	0.163113	0.163742	0.164372	0.165001	0.165631	0.16626	0.166889	0.167519	0.168148	0.168777	0.169407	0.170036	0.170666	0.171295	0.171924	0.172554	0.173183	0.173812	0.174442	0.175071	0.175701	0.17633	0.176959	0.177589	0.178218	0.178847	0.178847	0.178847	0.178847	0.178847	0.178847	0.178847	0.178847	0.178847
MTH	-	-	-	-	-	-	-	-	-	-	-	-	-	-	-	-	-	-	-	-	-	-	-	-	-	-	-	-	-	-	-	-	-	-	-	-	-	-	-	-	-	-	-	-	-	-	-	-	-
HTH	-	-	-	-	-	-	-	-	-	-	-	-	-	-	-	-	-	-	-	-	-	-	-	-	-	-	-	-	-	-	-	-	-	-	-	-	-	-	-	-	-	-	-	-	-	-	-	-	-
SMD	-	-	-	-	-	-	-	-	-	-	-	-	-	-	-	-	-	-	-	-	-	-	-	-	-	-	-	-	-	-	-	-	-	-	-	-	-	-	-	-	-	-	-	-	-	-	-	-	-
T	-	-	-	-	-	-	-	-	-	-	-	-	-	-	-	-	-	-	-	-	-	-	-	-	-	-	-	-	-	-	-	-	-	-	-	-	-	-	-	-	-	-	-	-	-	-	-	-	-
Light	-	-	-	-	-	-	-	-	-	-	-	-	-	-	-	-	-	-	-	-	-	-	-	-	-	-	-	-	-	-	-	-	-	-	-	-	-	-	-	-	-	-	-	-	-	-	-	-	-
OE	-	-	-	-	-	-	-	-	-	-	-	-	-	-	-	-	-	-	-	-	-	-	-	-	-	-	-	-	-	-	-	-	-	-	-	-	-	-	-	-	-	-	-	-	-	-	-	-	-
Cooling	-	-	-	-	-	-	-	-	-	-	-	-	-	-	-	-	-	-	-	-	-	-	-	-	-	-	-	-	-	-	-	-	-	-	-	-	-	-	-	-	-	-	-	-	-	-	-	-	-
Solar thermal
End-use category	1960	1961	1962	1963	1964	1965	1966	1967	1968	1969	1970	1971	1972	1973	1974	1975	1976	1977	1978	1979	1980	1981	1982	1983	1984	1985	1986	1987	1988	1989	1990	1991	1992	1993	1994	1995	1996	1997	1998	1999	2000	2001	2002	2003	2004	2005	2006	2007	2008
LTH	0.207436	0.21167	0.215989	0.220397	0.224895	0.229485	0.234168	0.238947	0.243824	0.2488	0.253877	0.259059	0.259059	0.259059	0.259059	0.259059	0.259059	0.259059	0.259059	0.259059	0.259059	0.259059	0.259059	0.259059	0.259059	0.259059	0.259059	0.259059	0.259059	0.259059	0.259059	0.259059	0.259059	0.259059	0.259059	0.259059	0.259059	0.259059	0.259059	0.259059	0.259059	0.259059	0.259059	0.259059	0.259059	0.259059	0.259059	0.259059	0.259059
MTH	-	-	-	-	-	-	-	-	-	-	-	-	-	-	-	-	-	-	-	-	-	-	-	-	-	-	-	-	-	-	-	-	-	-	-	-	-	-	-	-	-	-	-	-	-	-	-	-	-
HTH	-	-	-	-	-	-	-	-	-	-	-	-	-	-	-	-	-	-	-	-	-	-	-	-	-	-	-	-	-	-	-	-	-	-	-	-	-	-	-	-	-	-	-	-	-	-	-	-	-
SMD	-	-	-	-	-	-	-	-	-	-	-	-	-	-	-	-	-	-	-	-	-	-	-	-	-	-	-	-	-	-	-	-	-	-	-	-	-	-	-	-	-	-	-	-	-	-	-	-	-
T	-	-	-	-	-	-	-	-	-	-	-	-	-	-	-	-	-	-	-	-	-	-	-	-	-	-	-	-	-	-	-	-	-	-	-	-	-	-	-	-	-	-	-	-	-	-	-	-	-
Light	-	-	-	-	-	-	-	-	-	-	-	-	-	-	-	-	-	-	-	-	-	-	-	-	-	-	-	-	-	-	-	-	-	-	-	-	-	-	-	-	-	-	-	-	-	-	-	-	-
OE	-	-	-	-	-	-	-	-	-	-	-	-	-	-	-	-	-	-	-	-	-	-	-	-	-	-	-	-	-	-	-	-	-	-	-	-	-	-	-	-	-	-	-	-	-	-	-	-	-
Cooling	-	-	-	-	-	-	-	-	-	-	-	-	-	-	-	-	-	-	-	-	-	-	-	-	-	-	-	-	-	-	-	-	-	-	-	-	-	-	-	-	-	-	-	-	-	-	-	-	-
Electricity
End-use category	1960	1961	1962	1963	1964	1965	1966	1967	1968	1969	1970	1971	1972	1973	1974	1975	1976	1977	1978	1979	1980	1981	1982	1983	1984	1985	1986	1987	1988	1989	1990	1991	1992	1993	1994	1995	1996	1997	1998	1999	2000	2001	2002	2003	2004	2005	2006	2007	2008
LTH	0.035	0.03524	0.03548	0.03572	0.03596	0.0362	0.03644	0.03668	0.03692	0.03716	0.0374	0.03766	0.03792	0.03818	0.03844	0.0387	0.03896	0.03922	0.03948	0.03974	0.04	0.0401	0.0402	0.0403	0.0404	0.0405	0.0406	0.0407	0.0408	0.0409	0.041	0.0411	0.0412	0.0413	0.0414	0.0415	0.0416	0.0417	0.0418	0.0419	0.042	0.0421	0.0422	0.0423	0.0424	0.0425	0.0426	0.0427	0.0428
MTH	-	-	-	-	-	-	-	-	-	-	-	-	-	-	-	-	-	-	-	-	-	-	-	-	-	-	-	-	-	-	-	-	-	-	-	-	-	-	-	-	-	-	-	-	-	-	-	-	-
HTH	0.544622	0.545242	0.545862	0.546481	0.547101	0.547721	0.548341	0.54896	0.54958	0.5502	0.55082	0.551452	0.552084	0.552716	0.553349	0.553981	0.554613	0.555246	0.555878	0.55651	0.557142	0.557455	0.557768	0.558081	0.558394	0.558707	0.55902	0.559333	0.559646	0.559959	0.560272	0.560585	0.560898	0.561211	0.561524	0.561837	0.56215	0.562463	0.562776	0.563089	0.563402	0.563715	0.564028	0.564341	0.564654	0.564967	0.56528	0.565593	0.565906
SMD	0.8	0.80372	0.80744	0.81116	0.81488	0.8186	0.82232	0.82604	0.82976	0.83348	0.8372	0.83848	0.83976	0.84104	0.84232	0.8436	0.84488	0.84616	0.84744	0.84872	0.85	0.85246	0.85492	0.85738	0.85984	0.8623	0.86476	0.86722	0.86968	0.87214	0.8746	0.87663	0.87866	0.88069	0.88272	0.88475	0.88678	0.88881	0.89084	0.89287	0.8949	0.89693	0.89896	0.90099	0.90302	0.90505	0.90708	0.90911	0.91114
T	0.75	0.75238	0.75476	0.75714	0.75952	0.7619	0.76428	0.76666	0.76904	0.77142	0.7738	0.77626	0.77872	0.78118	0.78364	0.7861	0.78856	0.79102	0.79348	0.79594	0.7984	0.80094	0.80348	0.80602	0.80856	0.8111	0.81364	0.81618	0.81872	0.82126	0.8238	0.826412	0.829025	0.831638	0.83425	0.836862	0.839475	0.842087	0.8447	0.84735	0.85	0.85262	0.85524	0.85786	0.86048	0.8631	0.86572	0.86834	0.87096
Light	0.0294348	0.0294783	0.0295217	0.0295652	0.0296087	0.0296522	0.0296957	0.0297391	0.0297826	0.0298261	0.0298696	0.0307252	0.0315808	0.0324365	0.0332921	0.0341477	0.0350034	0.035859	0.0367147	0.0375703	0.0384259	0.0396296	0.0408333	0.042037	0.0432407	0.0444444	0.0456481	0.0468519	0.0480556	0.0492593	0.050463	0.0516667	0.0528704	0.0540741	0.0552778	0.0564815	0.0576852	0.0588889	0.0600926	0.0612963	0.0625	0.0637037	0.0649074	0.0661111	0.0673148	0.0685185	0.0697222	0.0709259	0.0721296
OE	0.165272	0.167039	0.16882	0.170618	0.172432	0.174263	0.17611	0.177976	0.17986	0.181763	0.183685	0.183729	0.183712	0.183631	0.183483	0.183266	0.182976	0.182612	0.182168	0.181643	0.181032	0.177599	0.174069	0.17044	0.166712	0.162884	0.158953	0.154919	0.150781	0.146537	0.142186	0.139651	0.137104	0.134545	0.131974	0.129392	0.126798	0.124193	0.121576	0.117371	0.113373	0.10952	0.106802	0.10412	0.101429	0.0986649	0.0957468	0.0925697	0.0893727
Cooling	0.0469785	0.0479583	0.048938	0.0499178	0.0508976	0.0518774	0.0528571	0.0538369	0.0548167	0.0557965	0.0567762	0.057756	0.0587358	0.0597155	0.0606953	0.0616751	0.0626549	0.0636346	0.0646144	0.0655942	0.066574	0.0675537	0.0685335	0.0695133	0.070493	0.0714728	0.0724526	0.0734324	0.0744121	0.0753919	0.0763717	0.0773515	0.0783312	0.079311	0.0802908	0.0812705	0.0822503	0.0832301	0.0842099	0.0851896	0.0861694	0.0871492	0.088129	0.0891087	0.0900885	0.0910683	0.092048	0.0930278	0.0940076
Heat
End-use category	1960	1961	1962	1963	1964	1965	1966	1967	1968	1969	1970	1971	1972	1973	1974	1975	1976	1977	1978	1979	1980	1981	1982	1983	1984	1985	1986	1987	1988	1989	1990	1991	1992	1993	1994	1995	1996	1997	1998	1999	2000	2001	2002	2003	2004	2005	2006	2007	2008
LTH	0.153672	0.154302	0.154931	0.155561	0.15619	0.156819	0.157449	0.158078	0.158707	0.159337	0.159966	0.160596	0.161225	0.161854	0.162484	0.163113	0.163742	0.164372	0.165001	0.165631	0.16626	0.166889	0.167519	0.168148	0.168777	0.169407	0.170036	0.170666	0.171295	0.171924	0.172554	0.173183	0.173812	0.174442	0.175071	0.175701	0.17633	0.176959	0.177589	0.178218	0.178847	0.178847	0.178847	0.178847	0.178847	0.178847	0.178847	0.178847	0.178847
MTH	0.251634	0.252969	0.25431	0.255656	0.257007	0.258364	0.259726	0.261094	0.262468	0.263847	0.265231	0.266621	0.268016	0.269417	0.270823	0.272235	0.273653	0.275076	0.276504	0.277938	0.279377	0.280822	0.282273	0.283728	0.28519	0.286657	0.288129	0.289607	0.29109	0.292579	0.294074	0.295573	0.297079	0.29859	0.300106	0.301628	0.303155	0.304688	0.306226	0.30777	0.30932	0.30932	0.30932	0.30932	0.30932	0.30932	0.30932	0.30932	0.30932
HTH	0.497629	0.500269	0.50292	0.505582	0.508254	0.510937	0.513632	0.516337	0.519053	0.52178	0.524518	0.527266	0.530026	0.532796	0.535577	0.53837	0.541173	0.543986	0.546811	0.549647	0.552493	0.555351	0.558219	0.561098	0.563988	0.566889	0.569801	0.572723	0.575657	0.578601	0.581556	0.584523	0.5875	0.590487	0.593486	0.596496	0.599516	0.602548	0.60559	0.608643	0.611707	0.611707	0.611707	0.611707	0.611707	0.611707	0.611707	0.611707	0.611707
SMD	-	-	-	-	-	-	-	-	-	-	-	-	-	-	-	-	-	-	-	-	-	-	-	-	-	-	-	-	-	-	-	-	-	-	-	-	-	-	-	-	-	-	-	-	-	-	-	-	-
T	-	-	-	-	-	-	-	-	-	-	-	-	-	-	-	-	-	-	-	-	-	-	-	-	-	-	-	-	-	-	-	-	-	-	-	-	-	-	-	-	-	-	-	-	-	-	-	-	-
Light	-	-	-	-	-	-	-	-	-	-	-	-	-	-	-	-	-	-	-	-	-	-	-	-	-	-	-	-	-	-	-	-	-	-	-	-	-	-	-	-	-	-	-	-	-	-	-	-	-
OE	-	-	-	-	-	-	-	-	-	-	-	-	-	-	-	-	-	-	-	-	-	-	-	-	-	-	-	-	-	-	-	-	-	-	-	-	-	-	-	-	-	-	-	-	-	-	-	-	-
Cooling	-	-	-	-	-	-	-	-	-	-	-	-	-	-	-	-	-	-	-	-	-	-	-	-	-	-	-	-	-	-	-	-	-	-	-	-	-	-	-	-	-	-	-	-	-	-	-	-	-
[truncated: 4 more columns]

## Sheet: C
C. Electricity shares per end-use, per sector, for Portugal (1960-2009)
Industry
End-use category	1960	1961	1962	1963	1964	1965	1966	1967	1968	1969	1970	1971	1972	1973	1974	1975	1976	1977	1978	1979	1980	1981	1982	1983	1984	1985	1986	1987	1988	1989	1990	1991	1992	1993	1994	1995	1996	1997	1998	1999	2000	2001	2002	2003	2004	2005	2006	2007	2008
LTH	0	0	0	0	0	0	0	0	0	0	0	0	0	0	0	0	0	0	0	0	0	0	0	0	0	0	0	0	0	0	0	0	0	0	0	0	0	0	0	0	0	0	0	0	0	0	0	0	0
MTH	0	0	0	0	0	0	0	0	0	0	0	0	0	0	0	0	0	0	0	0	0	0	0	0	0	0	0	0	0	0	0	0	0	0	0	0	0	0	0	0	0	0	0	0	0	0	0	0	0
HTH	0.049	0.05025	0.0515	0.05275	0.054	0.05525	0.0565	0.05775	0.059	0.0628	0.0666	0.0704	0.0742	0.078	0.0785	0.079	0.0795	0.08	0.0805	0.081	0.0815	0.082	0.0825	0.083	0.0835	0.084	0.0845	0.085	0.0855	0.086	0.0865	0.087	0.0893333	0.0916667	0.094	0.0965	0.099	0.1015	0.104	0.104	0.104	0.104	0.104	0.104	0.104	0.104	0.104	0.104	0.104
SMD	0.668911	0.667728	0.666546	0.665363	0.664181	0.662998	0.661815	0.660633	0.65945	0.655718	0.651985	0.648252	0.64452	0.640787	0.640354	0.639922	0.639489	0.639057	0.638624	0.638191	0.637759	0.637326	0.636894	0.636461	0.636028	0.635596	0.635163	0.63473	0.634298	0.633865	0.633433	0.633	0.637333	0.641667	0.646	0.6425	0.639	0.6355	0.632	0.632	0.632	0.632	0.632	0.632	0.632	0.632	0.632	0.632	0.632
T	0	0	0	0	0	0	0	0	0	0	0	0	0	0	0	0	0	0	0	0	0	0	0	0	0	0	0	0	0	0	0	0	0	0	0	0	0	0	0	0	0	0	0	0	0	0	0	0	0
Light	0.0726444	0.0723333	0.0720222	0.0717111	0.0714	0.0710889	0.0707778	0.0704667	0.0701556	0.0698444	0.0695333	0.0692222	0.0689111	0.0686	0.0682889	0.0679778	0.0676667	0.0673556	0.0670444	0.0667333	0.0664222	0.0661111	0.0658	0.0654889	0.0651778	0.0648667	0.0645556	0.0642444	0.0639333	0.0636222	0.0633111	0.063	0.0633333	0.0636667	0.064	0.06425	0.0645	0.06475	0.065	0.065	0.065	0.065	0.065	0.065	0.065	0.065	0.065	0.065	0.065
OE	0.133378	0.133688	0.133999	0.134309	0.134619	0.13493	0.13524	0.135551	0.135861	0.136171	0.136482	0.136792	0.137103	0.137413	0.137723	0.138034	0.138344	0.138654	0.138965	0.139275	0.139586	0.139896	0.140206	0.140517	0.140827	0.141138	0.141448	0.141758	0.142069	0.142379	0.14269	0.143	0.135667	0.128333	0.121	0.11975	0.1185	0.11725	0.116	0.116	0.116	0.116	0.116	0.116	0.116	0.116	0.116	0.116	0.116
Cooling	0.0760667	0.076	0.0759333	0.0758667	0.0758	0.0757333	0.0756667	0.0756	0.0755333	0.0754667	0.0754	0.0753333	0.0752667	0.0752	0.0751333	0.0750667	0.075	0.0749333	0.0748667	0.0748	0.0747333	0.0746667	0.0746	0.0745333	0.0744667	0.0744	0.0743333	0.0742667	0.0742	0.0741333	0.0740667	0.074	0.0743333	0.0746667	0.075	0.077	0.079	0.081	0.083	0.083	0.083	0.083	0.083	0.083	0.083	0.083	0.083	0.083	0.083
Transport
End-use category	1960	1961	1962	1963	1964	1965	1966	1967	1968	1969	1970	1971	1972	1973	1974	1975	1976	1977	1978	1979	1980	1981	1982	1983	1984	1985	1986	1987	1988	1989	1990	1991	1992	1993	1994	1995	1996	1997	1998	1999	2000	2001	2002	2003	2004	2005	2006	2007	2008
LTH	0	0	0	0	0	0	0	0	0	0	0	0	0	0	0	0	0	0	0	0	0	0	0	0	0	0	0	0	0	0	0	0	0	0	0	0	0	0	0	0	0	0	0	0	0	0	0	0	0
MTH	0	0	0	0	0	0	0	0	0	0	0	0	0	0	0	0	0	0	0	0	0	0	0	0	0	0	0	0	0	0	0	0	0	0	0	0	0	0	0	0	0	0	0	0	0	0	0	0	0
HTH	0	0	0	0	0	0	0	0	0	0	0	0	0	0	0	0	0	0	0	0	0	0	0	0	0	0	0	0	0	0	0	0	0	0	0	0	0	0	0	0	0	0	0	0	0	0	0	0	0
SMD	0	0	0	0	0	0	0	0	0	0	0	0	0	0	0	0	0	0	0	0	0	0	0	0	0	0	0	0	0	0	0	0	0	0	0	0	0	0	0	0	0	0	0	0	0	0	0	0	0
T	1	1	1	1	1	1	1	1	1	1	1	1	1	1	1	1	1	1	1	1	1	1	1	1	1	1	1	1	1	1	1	1	1	1	1	1	1	1	1	1	1	1	1	1	1	1	1	1	1
Light	0	0	0	0	0	0	0	0	0	0	0	0	0	0	0	0	0	0	0	0	0	0	0	0	0	0	0	0	0	0	0	0	0	0	0	0	0	0	0	0	0	0	0	0	0	0	0	0	0
OE	0	0	0	0	0	0	0	0	0	0	0	0	0	0	0	0	0	0	0	0	0	0	0	0	0	0	0	0	0	0	0	0	0	0	0	0	0	0	0	0	0	0	0	0	0	0	0	0	0
Cooling	0	0	0	0	0	0	0	0	0	0	0	0	0	0	0	0	0	0	0	0	0	0	0	0	0	0	0	0	0	0	0	0	0	0	0	0	0	0	0	0	0	0	0	0	0	0	0	0	0
Residential
End-use category	1960	1961	1962	1963	1964	1965	1966	1967	1968	1969	1970	1971	1972	1973	1974	1975	1976	1977	1978	1979	1980	1981	1982	1983	1984	1985	1986	1987	1988	1989	1990	1991	1992	1993	1994	1995	1996	1997	1998	1999	2000	2001	2002	2003	2004	2005	2006	2007	2008
LTH	0.097	0.103322	0.109644	0.115967	0.122289	0.128611	0.134933	0.141256	0.147578	0.1539	0.160222	0.165778	0.171333	0.176889	0.201111	0.212333	0.225556	0.230778	0.241	0.251	0.261	0.255	0.241	0.241	0.241	0.237667	0.234333	0.231	0.230667	0.230333	0.23	0.236	0.242	0.248	0.246333	0.244667	0.243	0.241333	0.247667	0.254	0.254	0.254	0.254	0.254	0.254	0.254	0.254	0.254	0.254
MTH	0	0	0	0	0	0	0	0	0	0	0	0	0	0	0	0	0	0	0	0	0	0	0	0	0	0	0	0	0	0	0	0	0	0	0	0	0	0	0	0	0	0	0	0	0	0	0	0	0
HTH	0	0	0	0	0	0	0	0	0	0	0	0	0	0	0	0	0	0	0	0	0	0	0	0	0	0	0	0	0	0	0	0	0	0	0	0	0	0	0	0	0	0	0	0	0	0	0	0	0
SMD	0.224	0.230161	0.236321	0.242482	0.248643	0.254803	0.260964	0.267125	0.273285	0.279446	0.285607	0.292534	0.299462	0.306389	0.289711	0.286033	0.280356	0.282678	0.28	0.268	0.256	0.269	0.294	0.3035	0.313	0.307	0.301	0.295	0.297667	0.300333	0.303	0.304667	0.306333	0.308	0.315917	0.323833	0.33175	0.339667	0.315833	0.292	0.292	0.292	0.292	0.292	0.292	0.292	0.292	0.292	0.292
T	0	0	0	0	0	0	0	0	0	0	0	0	0	0	0	0	0	0	0	0	0	0	0	0	0	0	0	0	0	0	0	0	0	0	0	0	0	0	0	0	0	0	0	0	0	0	0	0	0
Light	0.241	0.232462	0.223923	0.215385	0.206846	0.198308	0.189769	0.181231	0.172692	0.164154	0.155615	0.147077	0.138538	0.13	0.1264	0.1228	0.1192	0.1156	0.112	0.1095	0.107	0.108	0.108	0.106	0.104	0.103	0.102	0.101	0.0993333	0.0976667	0.096	0.0943333	0.0926667	0.091	0.0905	0.09	0.0895	0.089	0.092	0.095	0.095	0.095	0.095	0.095	0.095	0.095	0.095	0.095	0.095
OE	0.144	0.139944	0.135889	0.131833	0.127778	0.123722	0.119667	0.115611	0.111556	0.1075	0.103444	0.0993889	0.0953333	0.0912778	0.0872222	0.0831667	0.0791111	0.0750556	0.071	0.0715	0.072	0.073	0.074	0.0735	0.073	0.0733333	0.0736667	0.074	0.0753333	0.0766667	0.078	0.0793333	0.0806667	0.082	0.08425	0.0865	0.08875	0.091	0.092	0.093	0.093	0.093	0.093	0.093	0.093	0.093	0.093	0.093	0.093
Cooling	0.294	0.294111	0.294222	0.294333	0.294444	0.294556	0.294667	0.294778	0.294889	0.295	0.295111	0.295222	0.295333	0.295444	0.295556	0.295667	0.295778	0.295889	0.296	0.3	0.304	0.295	0.283	0.276	0.269	0.279	0.289	0.299	0.297	0.295	0.293	0.285667	0.278333	0.271	0.263	0.255	0.247	0.239	0.2525	0.266	0.266	0.266	0.266	0.266	0.266	0.266	0.266	0.266	0.266
Services
End-use category	1960	1961	1962	1963	1964	1965	1966	1967	1968	1969	1970	1971	1972	1973	1974	1975	1976	1977	1978	1979	1980	1981	1982	1983	1984	1985	1986	1987	1988	1989	1990	1991	1992	1993	1994	1995	1996	1997	1998	1999	2000	2001	2002	2003	2004	2005	2006	2007	2008
LTH	0.005	0.00569231	0.00638462	0.00707692	0.00776923	0.00846154	0.00915385	0.00984615	0.0105385	0.0112308	0.0119231	0.0126154	0.0133077	0.014	0.0153333	0.0166667	0.018	0.0193333	0.0206667	0.022	0.0247	0.0274	0.0301	0.0328	0.0355	0.0382	0.0409	0.0436	0.0463	0.049	0.0498333	0.0506667	0.0515	0.0523333	0.0531667	0.054	0.0645	0.075	0.0855	0.096	0.097	0.097	0.097	0.097	0.097	0.097	0.097	0.097	0.097
MTH	0	0	0	0	0	0	0	0	0	0	0	0	0	0	0	0	0	0	0	0	0	0	0	0	0	0	0	0	0	0	0	0	0	0	0	0	0	0	0	0	0	0	0	0	0	0	0	0	0
HTH	0	0	0	0	0	0	0	0	0	0	0	0	0	0	0	0	0	0	0	0	0	0	0	0	0	0	0	0	0	0	0	0	0	0	0	0	0	0	0	0	0	0	0	0	0	0	0	0	0
SMD	0.062	0.0555385	0.0490769	0.0426154	0.0361538	0.0296923	0.0232308	0.0167692	0.0103077	0.0166462	0.0229846	0.0293231	0.0356615	0.042	0.0696667	0.0973333	0.125	0.152667	0.180333	0.208	0.2151	0.2222	0.2293	0.2364	0.2435	0.2506	0.2577	0.2648	0.2719	0.279	0.2845	0.29	0.2955	0.301	0.3065	0.312	0.3035	0.295	0.2865	0.278	0.259	0.259	0.259	0.259	0.259	0.259	0.259	0.259	0.259
T	0	0	0	0	0	0	0	0	0	0	0	0	0	0	0	0	0	0	0	0	0	0	0	0	0	0	0	0	0	0	0	0	0	0	0	0	0	0	0	0	0	0	0	0	0	0	0	0	0
Light	0.632	0.629538	0.627077	0.624615	0.622154	0.619692	0.617231	0.614769	0.612308	0.609846	0.607385	0.604923	0.602462	0.6	0.568333	0.536667	0.505	0.473333	0.441667	0.41	0.4073	0.4046	0.4019	0.3992	0.3965	0.3938	0.3911	0.3884	0.3857	0.383	0.380833	0.378667	0.3765	0.374333	0.372167	0.37	0.35775	0.3455	0.33325	0.321	0.318	0.318	0.318	0.318	0.318	0.318	0.318	0.318	0.318
OE	0.043	0.0442308	0.0454615	0.0466923	0.0479231	0.0491538	0.0503846	0.0516154	0.0528462	0.0540769	0.0553077	0.0565385	0.0577692	0.059	0.0606667	0.0623333	0.064	0.0656667	0.0673333	0.069	0.0709	0.0728	0.0747	0.0766	0.0785	0.0804	0.0823	0.0842	0.0861	0.088	0.0905	0.093	0.0955	0.098	0.1005	0.103	0.10375	0.1045	0.10525	0.106	0.123	0.123	0.123	0.123	0.123	0.123	0.123	0.123	0.123
Cooling	0.258	0.265	0.272	0.279	0.286	0.293	0.3	0.307	0.314	0.3082	0.3024	0.2966	0.2908	0.285	0.286	0.287	0.288	0.289	0.29	0.291	0.282	0.273	0.264	0.255	0.246	0.237	0.228	0.219	0.21	0.201	0.194333	0.187667	0.181	0.174333	0.167667	0.161	0.1705	0.18	0.1895	0.199	0.203	0.203	0.203	0.203	0.203	0.203	0.203	0.203	0.203
Miscellaneous
End-use category	1960	1961	1962	1963	1964	1965	1966	1967	1968	1969	1970	1971	1972	1973	1974	1975	1976	1977	1978	1979	1980	1981	1982	1983	1984	1985	1986	1987	1988	1989	1990	1991	1992	1993	1994	1995	1996	1997	1998	1999	2000	2001	2002	2003	2004	2005	2006	2007	2008
LTH	0	0	0	0	0	0	0	0	0	0	0	0	0	0	0	0	0	0	0	0	0	0	0	0	0	0	0	0	0	0	0	0	0	0	0	0	0	0	0	0	0	0	0	0	0	0	0	0	0
MTH	0	0	0	0	0	0	0	0	0	0	0	0	0	0	0	0	0	0	0	0	0	0	0	0	0	0	0	0	0	0	0	0	0	0	0	0	0	0	0	0	0	0	0	0	0	0	0	0	0
HTH	0	0	0	0	0	0	0	0	0	0	0	0	0	0	0	0	0	0	0	0	0	0	0	0	0	0	0	0	0	0	0	0	0	0	0	0	0	0	0	0	0	0	0	0	0	0	0	0	0
SMD	0.062	0.0555385	0.0490769	0.0426154	0.0361538	0.0296923	0.0232308	0.0167692	0.0103077	0.0166462	0.0229846	0.0293231	0.0356615	0.042	0.0696667	0.0973333	0.125	0.152667	0.180333	0.208	0.2151	0.2222	0.2293	0.2364	0.2435	0.2506	0.2577	0.2648	0.2719	0.279	0.2845	0.29	0.2955	0.301	0.3065	0.312	0.3035	0.295	0.2865	0.278	0.259	0.259	0.259	0.259	0.259	0.259	0.259	0.259	0.259
T	0	0	0	0	0	0	0	0	0	0	0	0	0	0	0	0	0	0	0	0	0	0	0	0	0	0	0	0	0	0	0	0	0	0	0	0	0	0	0	0	0	0	0	0	0	0	0	0	0
Light	0.0726444	0.0723333	0.0720222	0.0717111	0.0714	0.0710889	0.0707778	0.0704667	0.0701556	0.0698444	0.0695333	0.0692222	0.0689111	0.0686	0.0682889	0.0679778	0.0676667	0.0673556	0.0670444	0.0667333	0.0664222	0.0661111	0.0658	0.0654889	0.0651778	0.0648667	0.0645556	0.0642444	0.0639333	0.0636222	0.0633111	0.063	0.0633333	0.0636667	0.064	0.06425	0.0645	0.06475	0.065	0.065	0.065	0.065	0.065	0.065	0.065	0.065	0.065	0.065	0.065
OE	0.602356	0.601436	0.600516	0.599597	0.598677	0.597757	0.596838	0.595918	0.594998	0.594079	0.593159	0.592239	0.59132	0.5904	0.560711	0.531022	0.501333	0.471644	0.441956	0.412267	0.411778	0.411289	0.4108	0.410311	0.409822	0.409333	0.408844	0.408356	0.407867	0.407378	0.408022	0.408667	0.408667	0.408667	0.408667	0.40875	0.397	0.38525	0.3735	0.362	0.376	0.376	0.376	0.376	0.376	0.376	0.376	0.376	0.376
Cooling	0.258	0.265	0.272	0.279	0.286	0.293	0.3	0.307	0.314	0.3082	0.3024	0.2966	0.2908	0.285	0.286	0.287	0.288	0.289	0.29	0.291	0.282	0.273	0.264	0.255	0.246	0.237	0.228	0.219	0.21	0.201	0.194333	0.187667	0.181	0.174333	0.167667	0.161	0.1705	0.18	0.1895	0.199	0.203	0.203	0.203	0.203	0.203	0.203	0.203	0.203	0.203
[truncated: 1 more columns]
